# Supplementary material
Source: PubMed Central journal article supplement (PMC2833074)
Supplement: 2009.009647_1.pdf [file 2009.009647_1.pdf]

# T cell/histiocyte rich large B-cell lymphoma shows transcriptional features suggestive of a tolerogenic host immune response

Peter Van Loo,<sup>1,2,3</sup> Thomas Tousseyn,<sup>4</sup> Vera Vanhentenrijk,<sup>4</sup> Daan Dierickx,<sup>5</sup> Agnieszka Malecka,<sup>6</sup> Isabelle Vanden Bempt,<sup>4</sup> Gregor Verhoef,<sup>5</sup> Jan Delabie,<sup>6</sup> Peter Marynen,<sup>1,2</sup> Patrick Matthys,<sup>7</sup> and Chris De Wolf-Peeters<sup>4</sup>

<sup>1</sup>Department of Molecular and Developmental Genetics, VIB, Leuven, Belgium; <sup>2</sup>Department of Human Genetics, K.U.Leuven, Leuven, Belgium; <sup>3</sup>Bioinformatics group, Department of Electrical Engineering, K.U.Leuven, Leuven, Belgium; <sup>4</sup>Department of Pathology, University Hospitals K.U.Leuven, Leuven, Belgium; <sup>5</sup>Department of Hematology, University Hospitals K.U.Leuven, Leuven, Belgium; <sup>6</sup>Department of Pathology, The Norwegian Radium Hospital, University of Oslo, Oslo, Norway, and <sup>7</sup>Department of Microbiology and Immunology, Rega Institute for medical research, K.U.Leuven, Leuven, Belgium

Citation: Van Loo P, Tousseyn T, Vanhentenrijk V, Dierickx D, Malecka A, Vanden Bempt I, Verhoef G, Delabie J, Marynen P, Matthys P, and De Wolf-Peeters C. T cell/histiocyte rich large B-cell lymphoma shows transcriptional features suggestive of a tolerogenic host immune response. *Haematologica* 2009;XXX doi:10.3324/haematol.2009.009647

©2010 Ferrata Storti Foundation. This is an open-access paper.

## Supplementary Design and Methods

### Validation of microarray results by real-time quantitative RT-PCR

Ten genes measured by microarray gene expression profiling were validated by real-time quantitative RT-PCR. These genes were selected for their involvement in interferon pathways, macrophage activation and innate immune responses. Five of these genes were in the THRLBCL signature (*Online Supplementary Table 1B*), while the other 5 genes were key genes in the selected pathways that were not differentially expressed according to our strict statistical criteria.

One microgram total RNA was reverse transcribed using random primers and SuperScript II (Invitrogen, Merelbeke, Belgium), as recommended by the manufacturer. Relative quantification was subsequently performed using the comparative CT method (*see User Bulletin #2: Relative Quantitation of Gene Expression, Applied Biosystems*).

The real-time quantitative PCR reactions were performed using TaqMan gene expression assays (Applied Biosystems, Lennik, Belgium), with GAPDH, RPLP0 and PPIA as housekeeping genes, and the mixture of RNA from 5 reactive lymph nodes as calibrator sample.

### Real-time quantitative PCR measurements of three selected genes on additional TRHLBCL and NPLHL cases

To check the representativity of the cases included in the microarray analysis we analyzed all other samples for their expression of three selected genes by quantitative RT-PCR. The three genes were selected as (i) the two genes most significantly differentially expressed in our microarray experiment (FCER1G and VSIG4, both expressed higher in THRLBCL) and (ii) the gene with the most significantly higher expression in NPLHL (FCRL1). The real-time quantitative PCR reactions were performed at the institution where the

cases originated. For the cases from the University Hospitals of K.U.Leuven, SYBR green gene expression assays (Roche, Brussels, Belgium) were used, with GAPDH and HPRT1 as housekeeping genes.

As a reference sample, we used one THRLBCL sample, randomly chosen from the 10 cases subjected to microarray expression profiling. For the cases from the Rikshospitalet-Radiumhospitalet HF Oslo, FastStart Universal SYBR Green Master (ROX) (Roche, Oslo, Norway) was used with GUS ( $\beta$ -glucuronidase) and HPRT1 as housekeeping genes.

A random THRLBCL sample was chosen as a reference. The real-time quantitative PCR reactions were performed on a 7900HT Fast Real-Time PCR System (Applied Biosystems, Stockholm, Sweden).

For Supplementary Tables 1-5 please refer to corresponding pdfs:

[haematol.2009.009647 Suppl Table 1.pdf](#)

[haematol.2009.009647 Suppl Tables 2-3.pdf](#)

[haematol.2009.009647 Suppl Tables 4-5.pdf](#)

## Supplementary References

1. Monti S, Savage KJ, Kutok JL, Feuerhake F, Kurtin P, Mihm M, et al. Molecular profiling of diffuse large B-cell lymphoma identifies robust subtypes including one characterized by host inflammatory response. *Blood* 2005;105:1851-61.
2. Brune V, Tiacci E, Pfeil I, Doring C, Eckerle S, van Noesel CJ, et al. Origin and pathogenesis of nodular lymphocyte-predominant Hodgkin lymphoma as revealed by global gene expression analysis. *J Exp Med* 2008;205:2251-68.
3. Dave SS, Wright G, Tan B, Rosenwald A, Gascoyne RD, Chan WC, et al. Prediction of survival in follicular lymphoma based on molecular features of tumor-infiltrating immune cells. *N Engl J Med* 2004;351:2159-69.

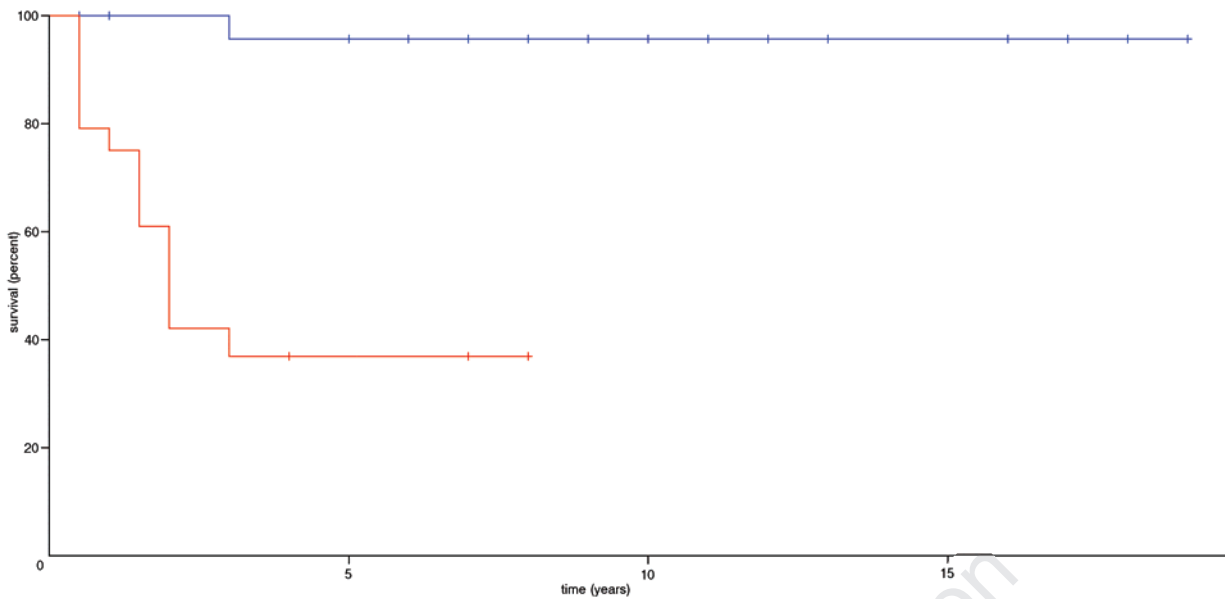

**Online Supplementary Figure 1.** Kaplan-Meier estimates of overall survival. Red: THRLBCL; blue: NLPHL. Survival was measured from the time of diagnosis to the time of disease-related death. Deaths due to tumor-unrelated causes as well as patients lost for follow-up were taken as censoring events. Plus-signs indicate (one or more) censored observations. The survival difference between THRLBCL and NLPHL is statistically significant ( $p = 6.0 \times 10^{-6}$ , obtained using the log-rank test).

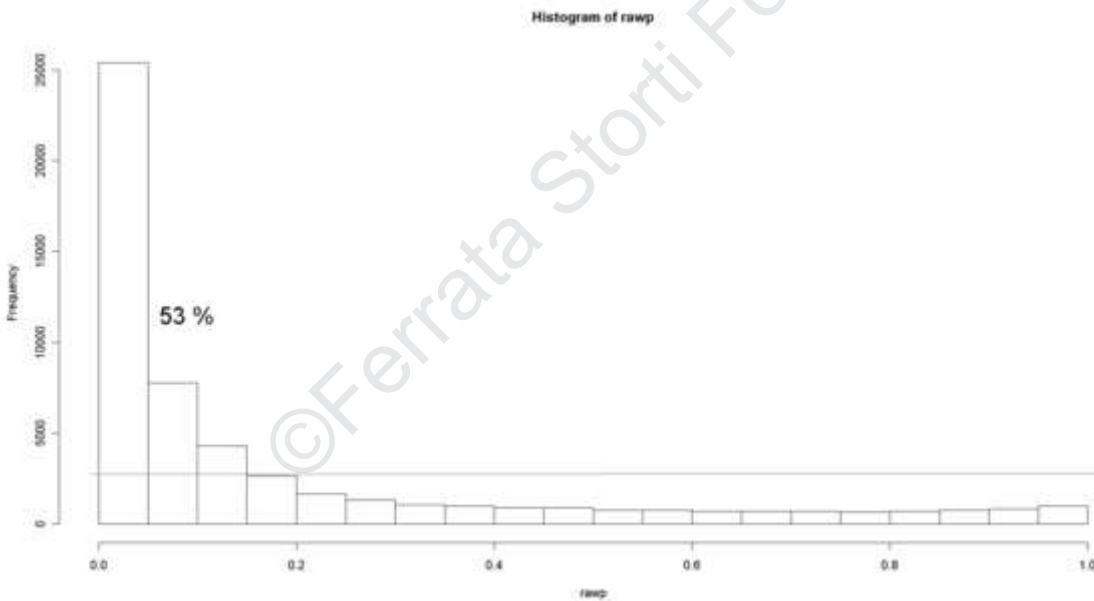

**Online Supplementary Figure 2.** Construction of THRLBCL and NLPHL expression signatures. The figure shows (uncorrected)  $p$ -value distribution of a  $t$ -test for genes differentially expressed between THRLBCL and NLPHL. Under the hypothesis that no genes are differentially regulated between the two lymphomas, these  $p$ -values should be distributed uniformly between 0 and 1. Aiming to estimate the number of genes (or more correctly: microarray probe sets) differentially regulated, we inspected the deviation from this uniform distribution (indicated by the red line in the figure), and found that 53 % of the probe sets differed in expression between THRLBCL and NLPHL, indicating that the expression profiles of both lymphomas are extremely dissimilar. Therefore, we focused on highly significant differentially expressed genes for the construction of THRLBCL and NLPHL expression signatures. We used  $p < 0.001$  after correction for multiple testing as an extremely stringent cut-off, and obtained 874 probe sets, corresponding to 527 unique genes.

**Supplementary Tables****Supplementary Table 1. Gene expression signatures of THRLBCL and NLPHL.****A. Signature of NLPHL**

| HGNC    | Ensembl ID      | description                                                                                                                                                                                                                                                     | fold difference | p-value | corrected p-value |
|---------|-----------------|-----------------------------------------------------------------------------------------------------------------------------------------------------------------------------------------------------------------------------------------------------------------|-----------------|---------|-------------------|
| FCRL1   | ENSG00000163534 | Fc receptor-like 1                                                                                                                                                                                                                                              | 32.1            | 2.3E-12 | 1.1E-05           |
|         | ENSG00000167483 | B-cell novel protein 1                                                                                                                                                                                                                                          | 21.7            | 3.7E-12 | 1.1E-05           |
| PAX5    | ENSG00000196092 | Paired box protein Pax-5 (B-cell-specific transcription factor) (BSAP).                                                                                                                                                                                         | 8.3             | 4.9E-12 | 2.2E-05           |
| BCL11A  | ENSG00000119866 | B-cell lymphoma/leukemia 11A (B-cell CLL/lymphoma 11A) (COUP-TF- interacting protein 1) (Ecotropic viral integration site 9 protein) (EVI-9).                                                                                                                   | 12.0            | 1.1E-11 | 1.1E-05           |
| BACH2   | ENSG00000112182 | Transcription regulator protein BACH2 (BTB and CNC homolog 2).                                                                                                                                                                                                  | 10.4            | 6.2E-11 | 3.2E-05           |
| MEF2C   | ENSG00000081189 | Myocyte-specific enhancer factor 2C.                                                                                                                                                                                                                            | 5.6             | 8.6E-11 | 3.2E-05           |
| GNG7    | ENSG00000176533 | Guanine nucleotide-binding protein G(I)/G(S)/G(O) gamma-7 subunit precursor.                                                                                                                                                                                    | 6.2             | 1.9E-10 | 2.2E-05           |
| FGFR1OP | ENSG00000112486 | C-C chemokine receptor type 6 (C-C CKR-6) (CC-CKR-6) (CCR-6) (LARC receptor) (GPR-CY4) (GPRCY4) (Chemokine receptor-like 3) (CKR-L3) (DRY6) (G-protein coupled receptor 29) (CD196 antigen).                                                                    | 23.4            | 2.1E-10 | 2.2E-05           |
| MOBK2B  | ENSG00000120162 | Mps one binder kinase activator-like 2B (Mob1 homolog 2b) (Protein Mob3B).                                                                                                                                                                                      | 11.0            | 2.2E-10 | 3.2E-05           |
| FCER2   | ENSG00000104921 | Low affinity immunoglobulin epsilon Fc receptor (Lymphocyte IgE receptor) (Fc-epsilon-R1I) (BLAST-2) (Immunoglobulin E-binding factor) (CD23 antigen) [Contains: Low affinity immunoglobulin epsilon Fc receptor membrane-bound form; Low affinity immunoglobul | 14.0            | 2.3E-10 | 3.2E-05           |
| MBD4    | ENSG00000129071 | Methyl-CpG-binding domain protein 4 (EC 3.2.2.-) (Methyl-CpG-binding protein MBD4) (Methyl-CpG-binding endonuclease 1) (Mismatch-specific DNA N-glycosylase).                                                                                                   | 1.9             | 7.5E-10 | 3.2E-05           |

A tumor tolerogenic microenvironment in THRLBCL

| HGNC     | Ensembl ID      | description                                                                                                                                                                                                                                     | fold difference | p-value | corrected p-value |
|----------|-----------------|-------------------------------------------------------------------------------------------------------------------------------------------------------------------------------------------------------------------------------------------------|-----------------|---------|-------------------|
| KLHL14   | ENSG00000197705 | Kelch-like protein 14.                                                                                                                                                                                                                          | 11.8            | 8.7E-10 | 6.5E-05           |
| KIAA1370 | ENSG00000047346 |                                                                                                                                                                                                                                                 | 2.1             | 9.3E-10 | 5.4E-05           |
| CD37     | ENSG00000104894 | Leukocyte antigen CD37 (Tetraspanin-26) (Tspan-26).                                                                                                                                                                                             | 3.2             | 1.0E-09 | 5.4E-05           |
| UBTF     | ENSG00000108312 | Nucleolar transcription factor 1 (Upstream-binding factor 1) (UBF-1) (Autoantigen NOR-90).                                                                                                                                                      | 1.8             | 1.1E-09 | 8.7E-05           |
| FAM62B   | ENSG00000117868 | family with sequence similarity 62 (C2 domain containing) member B                                                                                                                                                                              | 1.9             | 1.2E-09 | 8.7E-05           |
| SFPQ     | ENSG00000116560 | Splicing factor, proline- and glutamine-rich (Polypyrimidine tract-binding protein-associated splicing factor) (PTB-associated splicing factor) (PSF) (DNA-binding p52/p100 complex, 100 kDa subunit) (100-kDa DNA-pairing protein) (hPOMp100). | 2.1             | 1.6E-09 | 9.7E-05           |
| MKL2     | ENSG00000186260 | MKL/myocardin-like protein 2 (Myocardin-related transcription factor B) (MRTF-B) (Megakaryoblastic leukemia 2).                                                                                                                                 | 2.6             | 1.6E-09 | 6.5E-05           |
| MS4A1    | ENSG00000156738 | B-lymphocyte antigen CD20 (B-lymphocyte surface antigen B1) (Leu-16) (Bp35).                                                                                                                                                                    | 5.5             | 1.7E-09 | 3.2E-05           |
| ANP32B   | ENSG00000136938 | Acidic leucine-rich nuclear phosphoprotein 32 family member B (PHAPI2 protein) (Silver-stainable protein SSP29) (Acidic protein rich in leucines).                                                                                              | 1.6             | 2.0E-09 | 4.3E-05           |
| CD79A    | ENSG00000105369 | B-cell antigen receptor complex-associated protein alpha-chain precursor (Ig-alpha) (MB-1 membrane glycoprotein) (Surface IgM-associated protein) (Membrane-bound immunoglobulin-associated protein) (CD79a antigen).                           | 12.4            | 2.2E-09 | 3.2E-05           |
| CD22     | ENSG00000012124 | B-cell receptor CD22 precursor (Leu-14) (B-lymphocyte cell adhesion molecule) (BL-CAM) (Siglec-2).                                                                                                                                              | 15.0            | 2.4E-09 | 3.2E-05           |
| PPP1CC   | ENSG00000186298 | Serine/threonine-protein phosphatase PP1-gamma catalytic subunit (EC 3.1.3.16) (PP-1G) (Protein phosphatase 1C catalytic subunit).                                                                                                              | 1.6             | 3.1E-09 | 9.7E-05           |
| OXCT1    | ENSG00000083720 | Succinyl-CoA:3-ketoacid-coenzyme A transferase 1, mitochondrial precursor (EC 2.8.3.5) (Somatic-type succinyl CoA:3-oxoacid CoA-transferase) (Scot-S).                                                                                          | 1.6             | 3.3E-09 | 9.7E-05           |

A tumor tolerogenic microenvironment in THRLBCL

| HGNC     | Ensembl ID      | description                                                                                                                                                                                                                       | fold difference | p-value | corrected p-value |
|----------|-----------------|-----------------------------------------------------------------------------------------------------------------------------------------------------------------------------------------------------------------------------------|-----------------|---------|-------------------|
| PPAPDC1B | ENSG00000147535 | HTPAP protein                                                                                                                                                                                                                     | 2.0             | 3.9E-09 | 9.7E-05           |
| CHMP7    | ENSG00000147457 | Protein CHMP7.                                                                                                                                                                                                                    | 2.5             | 4.6E-09 | 6.5E-05           |
| EEF2     | ENSG00000167658 | Elongation factor 2 (EF-2).                                                                                                                                                                                                       | 1.7             | 4.9E-09 | 9.7E-05           |
| ALS2CR13 | ENSG00000138439 | amyotrophic lateral sclerosis 2 (juvenile) chromosome region, candidate 13                                                                                                                                                        | 4.3             | 6.0E-09 | 9.7E-05           |
| SNORD50B | ENSG00000201865 | U50 small nucleolar RNA                                                                                                                                                                                                           | 2.7             | 6.3E-09 | 1.5E-04           |
| RABEP2   | ENSG00000177548 | Rab GTPase-binding effector protein 2 (Rabaptin-5beta).                                                                                                                                                                           | 2.6             | 6.4E-09 | 1.2E-04           |
| SYTL1    | ENSG00000142765 | Synaptotagmin-like protein 1 (Exophilin-7) (JFC1 protein) (SB146).                                                                                                                                                                | 3.9             | 7.1E-09 | 8.7E-05           |
| C1orf109 | ENSG00000116922 |                                                                                                                                                                                                                                   | 1.6             | 7.4E-09 | 8.7E-05           |
| FBL      | ENSG00000105202 | Fibrillarin (34 kDa nucleolar scleroderma antigen).                                                                                                                                                                               | 2.2             | 8.0E-09 | 1.6E-04           |
| RBM6     | ENSG00000004534 | RNA-binding protein 6 (RNA-binding motif protein 6) (RNA-binding protein DEF-3) (Lung cancer antigen NY-LU-12) (Protein G16).                                                                                                     | 1.6             | 8.1E-09 | 1.6E-04           |
| ZNF395   | ENSG00000186918 | F-box only protein 16.                                                                                                                                                                                                            | 6.4             | 8.3E-09 | 1.8E-04           |
| HOOK1    | ENSG00000134709 | Hook homolog 1 (h-hook1) (hHK1).                                                                                                                                                                                                  | 4.1             | 9.5E-09 | 1.3E-04           |
| PNN      | ENSG00000100941 | Pinin (140 kDa nuclear and cell adhesion-related phosphoprotein) (Domain-rich serine protein) (DRS-protein) (DRSP) (Melanoma metastasis clone A protein) (Desmosome-associated protein) (SR-like protein) (Nuclear protein SDK3). | 1.9             | 9.6E-09 | 1.8E-04           |
| SMARCE1  | ENSG00000073584 | SWI/SNF-related matrix-associated actin-dependent regulator of chromatin subfamily E member 1 (BRG1-associated factor 57).                                                                                                        | 1.4             | 9.7E-09 | 2.5E-04           |
| ATP2A3   | ENSG00000074370 | Sarcoplasmic/endoplasmic reticulum calcium ATPase 3 (EC 3.6.3.8) (Calcium pump 3) (SERCA3) (SR Ca(2+)-ATPase 3).                                                                                                                  | 2.4             | 9.7E-09 | 1.6E-04           |

A tumor tolerogenic microenvironment in THRLBCL

| HGNC    | Ensembl ID      | description                                                                                                                                                                   | fold difference | p-value | corrected p-value |
|---------|-----------------|-------------------------------------------------------------------------------------------------------------------------------------------------------------------------------|-----------------|---------|-------------------|
| ABLIM1  | ENSG00000099204 | Actin-binding LIM protein 1 (Actin-binding LIM protein family member 1) (abLIM-1) (Actin-binding double-zinc-finger protein) (LIMAB1) (Limatin).                              | 3.2             | 1.0E-08 | 1.1E-04           |
| UBE2D2  | ENSG00000131508 | ubiquitin-conjugating enzyme E2D 2 isoform 2                                                                                                                                  | 1.4             | 1.0E-08 | 2.5E-04           |
| C7orf30 | ENSG00000156928 |                                                                                                                                                                               | 1.3             | 1.1E-08 | 9.7E-05           |
| TBL1X   | ENSG00000101849 | F-box-like/WD repeat protein TBL1X (Transducin beta-like 1X protein) (Transducin-beta-like 1, X-linked) (SMAP55).                                                             | 2.3             | 1.1E-08 | 1.5E-04           |
| CRLF3   | ENSG00000176390 | cytokine receptor-like factor 3                                                                                                                                               | 1.6             | 1.1E-08 | 2.9E-04           |
|         | ENSG00000187904 |                                                                                                                                                                               | 2.6             | 1.3E-08 | 9.7E-05           |
| OFD1    | ENSG00000046651 | Oral-facial-digital syndrome 1 protein (Protein 71-7A).                                                                                                                       | 2.5             | 1.3E-08 | 9.7E-05           |
| SLTM    | ENSG00000137776 | modulator of estrogen induced transcription isoform c                                                                                                                         | 1.5             | 1.6E-08 | 2.7E-04           |
| RNF44   | ENSG00000146083 | ring finger protein 44                                                                                                                                                        | 1.6             | 1.6E-08 | 1.6E-04           |
| RNPC1   | ENSG00000132819 | RNA-binding region-containing protein 1 (HSRNASEB) (ssDNA binding protein SEB4) (CLL-associated antigen KW-5).                                                                | 2.1             | 1.6E-08 | 4.0E-04           |
| SF3B1   | ENSG00000115524 | Splicing factor 3B subunit 1 (Spliceosome-associated protein 155) (SAP 155) (SF3b155) (Pre-mRNA-splicing factor SF3b 155 kDa subunit).                                        | 1.4             | 1.6E-08 | 4.1E-04           |
| DDX17   | ENSG00000100201 | Probable ATP-dependent RNA helicase DDX17 (EC 3.6.1.-) (DEAD box protein 17) (RNA-dependent helicase p72) (DEAD box protein p72).                                             | 2.7             | 1.6E-08 | 1.5E-04           |
| PABPN1  | ENSG00000100836 | Polyadenylate-binding protein 2 (Poly(A)-binding protein 2) (PolyA binding protein II) (PABII) (Polyadenylate-binding nuclear protein 1) (Nuclear poly(A)-binding protein 1). | 1.3             | 1.7E-08 | 4.5E-04           |

A tumor tolerogenic microenvironment in THRLBCL

| HGNC     | Ensembl ID      | description                                                                                                                                                                                                                                            | fold difference | p-value | corrected p-value |
|----------|-----------------|--------------------------------------------------------------------------------------------------------------------------------------------------------------------------------------------------------------------------------------------------------|-----------------|---------|-------------------|
| RBBP4    | ENSG00000162521 | Histone-binding protein RBBP4 (Retinoblastoma-binding protein 4) (RBBP-4) (Retinoblastoma-binding protein p48) (Chromatin assembly factor 1 subunit C) (CAF-1 subunit C) (Chromatin assembly factor I p48 subunit) (CAF-I 48 kDa subunit) (CAF-I p48). | 1.4             | 1.8E-08 | 3.6E-04           |
|          | ENSG00000055163 | cytoplasmic FMR1 interacting protein 2                                                                                                                                                                                                                 | 2.2             | 1.8E-08 | 1.9E-04           |
| C1orf165 | ENSG00000162373 |                                                                                                                                                                                                                                                        | 6.3             | 1.8E-08 | 1.6E-04           |
| MALT1    | ENSG00000172175 | Mucosa-associated lymphoid tissue lymphoma translocation protein 1 (EC 3.4.22.-) (MALT lymphoma-associated translocation) (Paracaspase).                                                                                                               | 3.4             | 2.0E-08 | 5.4E-05           |
| C11orf2  | ENSG00000149823 | Protein C11orf2 (Another new gene 2 protein).                                                                                                                                                                                                          | 2.0             | 2.1E-08 | 2.5E-04           |
| PRKD2    | ENSG00000105287 | Serine/threonine-protein kinase D2 (EC 2.7.11.13) (nPKC-D2).                                                                                                                                                                                           | 2.0             | 2.3E-08 | 4.0E-04           |
| HNRPA1   | ENSG00000135486 | Heterogeneous nuclear ribonucleoprotein A1 (Helix-destabilizing protein) (Single-strand RNA-binding protein) (hnRNP core protein A1).                                                                                                                  | 1.8             | 2.4E-08 | 2.9E-04           |
| FOXP1    | ENSG00000114861 | Forkhead box protein P1.                                                                                                                                                                                                                               | 3.7             | 2.7E-08 | 9.7E-05           |
| CIRBP    | ENSG00000099622 | Cold-inducible RNA-binding protein (Glycine-rich RNA-binding protein CIRP) (A18 hnRNP).                                                                                                                                                                | 2.0             | 2.7E-08 | 6.4E-04           |
| CASP2    | ENSG00000106144 | Caspase-2 precursor (EC 3.4.22.-) (CASP-2) (ICH-1 protease) (ICH- 1L/1S) [Contains: Caspase-2 subunit p18; Caspase-2 subunit p13; Caspase-2 subunit p12].                                                                                              | 1.8             | 2.7E-08 | 1.5E-04           |
|          | ENSG00000176718 |                                                                                                                                                                                                                                                        | 3.0             | 2.8E-08 | 4.5E-04           |
| QRSL1    | ENSG00000130348 | glutaminyI-tRNA synthase (glutamine-hydrolyzing)-like 1                                                                                                                                                                                                | 3.7             | 2.9E-08 | 3.6E-04           |
| LUC7L2   | ENSG00000146963 | Putative RNA-binding protein Luc7-like 2.                                                                                                                                                                                                              | 1.3             | 3.0E-08 | 6.4E-04           |
| SH3YL1   | ENSG00000035115 | SH3 domain containing, Ysc84-like 1                                                                                                                                                                                                                    | 4.2             | 3.1E-08 | 5.2E-04           |

A tumor tolerogenic microenvironment in THRLBCL

| HGNC     | Ensembl ID      | description                                                                                                                                                               | fold difference | p-value | corrected p-value |
|----------|-----------------|---------------------------------------------------------------------------------------------------------------------------------------------------------------------------|-----------------|---------|-------------------|
| EIF3S6IP | ENSG00000100129 | Eukaryotic translation initiation factor 3 subunit 6-interacting protein.                                                                                                 | 1.6             | 3.2E-08 | 1.6E-04           |
| PLEKHF2  | ENSG00000175895 | phafin 2                                                                                                                                                                  | 2.0             | 3.4E-08 | 5.2E-04           |
| C6orf111 | ENSG00000132424 | Splicing factor, arginine/serine-rich 130 (Serine-arginine-rich splicing regulatory protein 130) (SRrp130) (SR-rich protein) (SR- related protein).                       | 2.0             | 3.5E-08 | 6.8E-04           |
| TMSL8    | ENSG00000158164 | NB thymosin beta (Thymosin-like protein 8).                                                                                                                               | 10.5            | 3.6E-08 | 6.3E-04           |
| JMJD1C   | ENSG00000171988 | Probable JmjC domain-containing histone demethylation protein 2C (EC 1.14.11.-) (Jumonji domain-containing protein 1C) (Thyroid receptor-interacting protein 8) (TRIP-8). | 1.9             | 3.8E-08 | 7.8E-04           |
| ZNF512   | ENSG00000198522 | Zinc finger protein 512.                                                                                                                                                  | 1.8             | 3.8E-08 | 4.5E-04           |
| ADD3     | ENSG00000148700 | Gamma-adducin (Adducin-like protein 70).                                                                                                                                  | 2.2             | 3.9E-08 | 1.3E-04           |
| RRS1     | ENSG00000179041 | Ribosome biogenesis regulatory protein homolog.                                                                                                                           | 1.6             | 4.0E-08 | 8.3E-04           |
| CD19     | ENSG00000177455 | B-lymphocyte antigen CD19 precursor (B-lymphocyte surface antigen B4) (Leu-12) (Differentiation antigen CD19).                                                            | 18.1            | 4.1E-08 | 9.7E-05           |
| CD180    | ENSG00000134061 | CD180 antigen precursor (Lymphocyte antigen 64) (Radioprotective 105 kDa protein).                                                                                        | 4.9             | 4.2E-08 | 4.5E-04           |
| RPL37    | ENSG00000145592 | 60S ribosomal protein L37 (G1.16).                                                                                                                                        | 2.9             | 4.3E-08 | 2.7E-04           |
| KIAA0892 | ENSG00000129933 |                                                                                                                                                                           | 1.5             | 4.3E-08 | 1.8E-04           |
| FOXO1A   | ENSG00000150907 | Forkhead box protein O1A (Forkhead in rhabdomyosarcoma).                                                                                                                  | 2.5             | 4.3E-08 | 1.4E-04           |
| DEF6     | ENSG00000023892 | differentially expressed in FDCEP 6 homolog                                                                                                                               | 1.7             | 4.5E-08 | 9.7E-05           |
| GPR18    | ENSG00000125245 | Probable G-protein coupled receptor 18.                                                                                                                                   | 3.0             | 4.6E-08 | 3.6E-04           |
|          | ENSG00000182319 |                                                                                                                                                                           | 5.3             | 4.7E-08 | 2.6E-04           |



A tumor tolerogenic microenvironment in THRLBCL

| HGNC     | Ensembl ID      | description                                                                                                                                                                                                        | fold difference | p-value | corrected p-value |
|----------|-----------------|--------------------------------------------------------------------------------------------------------------------------------------------------------------------------------------------------------------------|-----------------|---------|-------------------|
| PLAG1    | ENSG00000181690 | pleiomorphic adenoma gene 1                                                                                                                                                                                        | 4.4             | 4.7E-08 | 3.2E-05           |
| BANK1    | ENSG00000153064 | B-cell scaffold protein with ankyrin repeats 1                                                                                                                                                                     | 21.0            | 5.1E-08 | 5.4E-05           |
| GNB2L1   | ENSG00000204628 | Guanine nucleotide-binding protein subunit beta 2-like 1 (Guanine nucleotide-binding protein subunit beta-like protein 12.3) (Receptor of activated protein kinase C 1) (RACK1) (Receptor for activated C kinase). | 1.4             | 5.2E-08 | 8.7E-04           |
|          | ENSG00000112137 | Phosphatase and actin regulator 1.                                                                                                                                                                                 | 9.3             | 5.3E-08 | 6.8E-04           |
| RPL38    | ENSG00000172809 | 60S ribosomal protein L38.                                                                                                                                                                                         | 1.4             | 5.6E-08 | 3.1E-04           |
|          | ENSG00000180632 |                                                                                                                                                                                                                    | 1.7             | 5.7E-08 | 7.4E-04           |
| TIAM2    | ENSG00000146426 | Putative RNA-binding protein 16 (RNA-binding motif protein 16).                                                                                                                                                    | 1.5             | 6.2E-08 | 1.0E-03           |
| RABGAP1L | ENSG00000152061 | RAB GTPase activating protein 1-like isoform A                                                                                                                                                                     | 1.8             | 6.4E-08 | 6.1E-04           |
| ZCCHC7   | ENSG00000147905 | Zinc finger CCHC domain-containing protein 7.                                                                                                                                                                      | 2.6             | 6.4E-08 | 3.1E-04           |
| CD1C     | ENSG00000158481 | T-cell surface glycoprotein CD1c precursor (CD1c antigen).                                                                                                                                                         | 13.4            | 6.4E-08 | 5.3E-04           |
|          | ENSG00000111913 |                                                                                                                                                                                                                    | 2.7             | 6.5E-08 | 2.5E-04           |
| FBXO21   | ENSG00000135108 | F-box only protein 21.                                                                                                                                                                                             | 1.5             | 6.7E-08 | 8.0E-04           |
| CNOT7    | ENSG00000198791 | CCR4-NOT transcription complex subunit 7 (CCR4-associated factor 1) (CAF1) (BTG1-binding factor 1).                                                                                                                | 1.5             | 6.9E-08 | 2.5E-04           |
| FCRLM1   | ENSG00000132185 | Fc receptor-like and mucin-like 1 precursor (Fc receptor homolog expressed in B-cells) (Fc receptor related protein X) (FcRX) (Fc receptor-like protein).                                                          | 11.8            | 7.0E-08 | 2.8E-04           |
| ICAM3    | ENSG00000076662 | Intercellular adhesion molecule 3 precursor (ICAM-3) (ICAM-R) (CDw50) (CD50 antigen).                                                                                                                              | 2.2             | 7.0E-08 | 3.0E-04           |
| HP1BP3   | ENSG00000127483 | HP1-BP74                                                                                                                                                                                                           | 1.5             | 7.1E-08 | 9.4E-04           |

A tumor tolerogenic microenvironment in THRLBCL

| HGNC    | Ensembl ID      | description                                                                                                                                                                           | fold difference | p-value | corrected p-value |
|---------|-----------------|---------------------------------------------------------------------------------------------------------------------------------------------------------------------------------------|-----------------|---------|-------------------|
|         | ENSG00000145868 | F-box only protein 38 (Modulator of KLF7 activity homolog) (MoKA).                                                                                                                    | 1.3             | 7.1E-08 | 9.7E-04           |
|         | ENSG00000175857 |                                                                                                                                                                                       | 20.0            | 7.3E-08 | 1.6E-04           |
| UBE2G2  | ENSG00000184787 | Ubiquitin-conjugating enzyme E2 G2 (EC 6.3.2.19) (Ubiquitin-protein ligase G2) (Ubiquitin carrier protein G2).                                                                        | 1.4             | 7.3E-08 | 1.6E-04           |
| EEF1G   | ENSG00000186676 | Elongation factor 1-gamma (EF-1-gamma) (eEF-1B gamma).                                                                                                                                | 1.5             | 7.7E-08 | 1.3E-04           |
| RASGRP2 | ENSG00000068831 | RAS guanyl releasing protein 2 isoform 2                                                                                                                                              | 5.5             | 8.1E-08 | 7.8E-04           |
| CD79B   | ENSG00000007312 | B-cell antigen receptor complex-associated protein beta-chain precursor (B-cell-specific glycoprotein B29) (Immunoglobulin-associated B29 protein) (IG-beta) (CD79b antigen).         | 7.2             | 8.4E-08 | 9.7E-05           |
| REV1L   | ENSG00000135945 | DNA repair protein REV1 (EC 2.7.7.-) (Rev1-like terminal deoxycytidyl transferase) (Alpha integrin-binding protein 80) (AIBP80).                                                      | 1.7             | 8.6E-08 | 8.2E-04           |
| NAP1L1  | ENSG00000187109 | Nucleosome assembly protein 1-like 1 (NAP-1-related protein) (hNRP).                                                                                                                  | 1.8             | 9.8E-08 | 9.1E-04           |
| DGKA    | ENSG00000065357 | Diacylglycerol kinase alpha (EC 2.7.1.107) (Diglyceride kinase alpha) (DGK-alpha) (DAG kinase alpha) (80 kDa diacylglycerol kinase).                                                  | 3.6             | 1.2E-07 | 5.3E-04           |
| ZNF573  | ENSG00000189144 | zinc finger protein 573                                                                                                                                                               | 2.2             | 1.3E-07 | 6.7E-04           |
| SEPT1   | ENSG00000180096 | Septin-1 (LARP) (Serologically defined breast cancer antigen NY-BR- 24).                                                                                                              | 1.8             | 1.4E-07 | 9.7E-04           |
| CD52    | ENSG00000169442 | CAMPATH-1 antigen precursor (Cambridge pathology 1 antigen) (Epididymal secretory protein E5) (CD52 antigen) (CDw52).                                                                 | 3.0             | 1.5E-07 | 9.7E-05           |
| PIK3C2B | ENSG00000133056 | Phosphatidylinositol-4-phosphate 3-kinase C2 domain-containing beta polypeptide (EC 2.7.1.154) (Phosphoinositide 3-Kinase-C2-beta) (PtdIns-3-kinase C2 beta) (PI3K-C2beta) (C2-PI3K). | 4.6             | 1.5E-07 | 5.2E-04           |

A tumor tolerogenic microenvironment in THRLBCL

| HGNC    | Ensembl ID      | description                                                                                                                                                                                                                | fold difference | p-value | corrected p-value |
|---------|-----------------|----------------------------------------------------------------------------------------------------------------------------------------------------------------------------------------------------------------------------|-----------------|---------|-------------------|
| ZNF238  | ENSG00000179456 | Zinc finger protein 238 (Transcriptional repressor RP58) (58 kDa repressor protein) (Zinc finger protein C2H2-171) (Translin-associated zinc finger protein 1) (TAZ-1) (Zinc finger and BTB domain-containing protein 18). | 2.5             | 1.6E-07 | 5.8E-04           |
| POLR3E  | ENSG00000058600 | DNA-directed RNA polymerases III 80 kDa polypeptide (EC 2.7.7.6) (RNA polymerase III subunit 5) (RPC5).                                                                                                                    | 1.9             | 1.6E-07 | 5.2E-04           |
| MYCBP2  | ENSG00000005810 | Probable ubiquitin ligase protein MYCBP2 (EC 6.3.2.-) (Myc binding protein 2) (Protein associated with Myc) (Pam/highwire/rpm-1 protein).                                                                                  | 1.9             | 1.7E-07 | 8.7E-04           |
| VPREB3  | ENSG00000128218 | Pre-B lymphocyte protein 3 precursor (VpreB3 protein) (N27C7-2).                                                                                                                                                           | 30.5            | 2.0E-07 | 2.9E-04           |
| EIF4B   | ENSG00000063046 | Eukaryotic translation initiation factor 4B (eIF-4B).                                                                                                                                                                      | 1.8             | 2.1E-07 | 4.0E-04           |
| YTHDC1  | ENSG00000083896 | YTH domain-containing protein 1 (Putative splicing factor YT521).                                                                                                                                                          | 1.6             | 2.1E-07 | 3.6E-04           |
| IL16    | ENSG00000172349 | Interleukin-16 precursor (IL-16) (Lymphocyte chemoattractant factor) (LCF).                                                                                                                                                | 3.1             | 2.2E-07 | 7.8E-04           |
| EPHX2   | ENSG00000120915 | Epoxide hydrolase 2 (EC 3.3.2.3) (Soluble epoxide hydrolase) (SEH) (Epoxide hydratase) (Cytosolic epoxide hydrolase) (CEH).                                                                                                | 5.8             | 2.4E-07 | 9.1E-04           |
| PRKCB1  | ENSG00000166501 | Protein kinase C beta type (EC 2.7.11.13) (PKC-beta) (PKC-B).                                                                                                                                                              | 2.1             | 2.5E-07 | 6.4E-04           |
| SKIV2L2 | ENSG00000039123 | Superkiller viralicidic activity 2-like 2 (EC 3.6.1.-) (ATP-dependent helicase SKIV2L2).                                                                                                                                   | 1.5             | 2.7E-07 | 7.7E-04           |
|         | ENSG00000100796 |                                                                                                                                                                                                                            | 1.4             | 2.8E-07 | 9.4E-04           |
| EPB41   | ENSG00000159023 | Protein 4.1 (Band 4.1) (P4.1) (EPB4.1) (4.1R).                                                                                                                                                                             | 2.4             | 3.1E-07 | 4.7E-04           |
| RALGPS2 | ENSG00000116191 | Ral GEF with PH domain and SH3 binding motif 2 isoform 1                                                                                                                                                                   | 7.5             | 3.4E-07 | 2.8E-04           |
| CCDC57  | ENSG00000176155 | coiled-coil domain containing 57                                                                                                                                                                                           | 1.7             | 3.5E-07 | 6.8E-04           |
|         | ENSG00000198146 |                                                                                                                                                                                                                            | 1.9             | 3.5E-07 | 5.8E-04           |

## A tumor tolerogenic microenvironment in THRLBCL

| HGNC     | Ensembl ID      | description                                                                                                                                                                                                                                   | fold difference | p-value | corrected p-value |
|----------|-----------------|-----------------------------------------------------------------------------------------------------------------------------------------------------------------------------------------------------------------------------------------------|-----------------|---------|-------------------|
| ABCB4    | ENSG00000005471 | Multidrug resistance protein 3 (EC 3.6.3.44) (P-glycoprotein 3).                                                                                                                                                                              | 12.8            | 3.5E-07 | 1.6E-04           |
| IGHV@    | ENSG00000130076 | Ig alpha-1 chain C region.                                                                                                                                                                                                                    | 33.2            | 4.0E-07 | 9.7E-05           |
| SCN3A    | ENSG00000153253 | Sodium channel protein type 3 subunit alpha (Sodium channel protein type III subunit alpha) (Voltage-gated sodium channel subunit alpha Nav1.3) (Sodium channel protein, brain III subunit alpha) (Voltage-gated sodium channel subtype III). | 9.4             | 7.0E-07 | 2.7E-04           |
| TBC1D4   | ENSG00000136111 | TBC1 domain family member 4 (Akt substrate of 160 kDa) (AS160).                                                                                                                                                                               | 3.1             | 7.2E-07 | 8.9E-04           |
| HNRPM    | ENSG00000099783 | Heterogeneous nuclear ribonucleoprotein M (hnRNP M).                                                                                                                                                                                          | 1.4             | 1.7E-06 | 4.1E-04           |
| RPL15    | ENSG00000174748 | 60S ribosomal protein L15.                                                                                                                                                                                                                    | 1.7             | 1.8E-06 | 7.8E-04           |
| AFF3     | ENSG00000144218 | AF4/FMR2 family member 3 (Protein LAF-4) (Lymphoid nuclear protein related to AF4).                                                                                                                                                           | 13.8            | 2.0E-06 | 5.4E-04           |
| KIAA0125 | ENSG00000184618 |                                                                                                                                                                                                                                               | 10.6            | 2.6E-06 | 1.5E-04           |
| TCL1A    | ENSG00000100721 | T-cell leukemia/lymphoma protein 1A (P14 TCL1 protein) (TCL1 oncogene) (TCL-1 protein).                                                                                                                                                       | 56.5            | 3.2E-06 | 9.1E-04           |

## B. Signature of THRLBCL

| HGNC ID | Ensembl gene ID | Description                                                                                                                                | fold difference | p-value | corrected p-value |
|---------|-----------------|--------------------------------------------------------------------------------------------------------------------------------------------|-----------------|---------|-------------------|
| FCER1G  | ENSG00000158869 | High affinity immunoglobulin epsilon receptor gamma-subunit precursor (FceRI gamma) (IgE Fc receptor gamma-subunit) (Fc-epsilon RI-gamma). | 9.7             | 5.1E-13 | 1.1E-05           |
| VSIG4   | ENSG00000155659 | V-set and immunoglobulin domain-containing protein 4 precursor (Z39Ig protein).                                                            | 569.0           | 6.9E-13 | 1.1E-05           |
| PSTPIP2 | ENSG00000152229 | Proline-serine-threonine phosphatase-interacting protein 2.                                                                                | 27.4            | 1.0E-12 | 1.1E-05           |

A tumor tolerogenic microenvironment in THRLBCL

| HGNC ID | Ensembl gene ID | Description                                                                                                                                                                                   | fold difference | p-value | corrected p-value |
|---------|-----------------|-----------------------------------------------------------------------------------------------------------------------------------------------------------------------------------------------|-----------------|---------|-------------------|
| SLC31A2 | ENSG00000136867 | Probable low-affinity copper uptake protein 2 (hCTR2) (Copper transporter 2) (Solute carrier family 31 member 2).                                                                             | 5.8             | 1.1E-12 | 1.1E-05           |
| GLUL    | ENSG00000135821 | Glutamine synthetase (EC 6.3.1.2) (Glutamate--ammonia ligase) (GS).                                                                                                                           | 11.5            | 1.1E-12 | 1.1E-05           |
| GALC    | ENSG00000054983 | Galactocerebrosidase precursor (EC 3.2.1.46) (GALCERase) (Galactosylceramidase) (Galactosylceramide beta-galactosidase) (Galactocerebroside beta-galactosidase).                              | 3.6             | 1.4E-12 | 1.1E-05           |
| FPRL1   | ENSG00000171049 | FMLP-related receptor 1 (FMLP-R-1) (Lipoxin A4 receptor) (LXA4 receptor) (Formyl peptide receptor-like 1) (RFP) (HM63).                                                                       | 48.8            | 2.0E-12 | 1.1E-05           |
| MFSD1   | ENSG00000118855 | major facilitator superfamily domain containing 1                                                                                                                                             | 2.9             | 2.2E-12 | 1.1E-05           |
| CMKLR1  | ENSG00000174600 | Chemokine receptor-like 1 (G-protein coupled receptor DEZ) (G-protein coupled receptor ChemR23).                                                                                              | 7.1             | 2.8E-12 | 1.1E-05           |
| NINJ1   | ENSG00000131669 | Ninjurin-1 (Nerve injury-induced protein 1).                                                                                                                                                  | 5.7             | 4.6E-12 | 1.1E-05           |
| CEBPB   | ENSG00000172216 | CCAAT/enhancer-binding protein beta (C/EBP beta) (Nuclear factor NF- IL6) (Transcription factor 5).                                                                                           | 4.5             | 5.0E-12 | 2.2E-05           |
| BRI3    | ENSG00000164713 | Brain protein I3 (pRGR2).                                                                                                                                                                     | 3.3             | 8.2E-12 | 2.2E-05           |
| SDCBP   | ENSG00000137575 | Syntenin-1 (Syndecan-binding protein 1) (Melanoma differentiation- associated protein 9) (MDA-9) (Scaffold protein Pbp1) (Pro-TGF-alpha cytoplasmic domain-interacting protein 18) (TACIP18). | 2.3             | 8.5E-12 | 1.1E-05           |
| NRP2    | ENSG00000118257 | Neuropilin-2 precursor (Vascular endothelial cell growth factor 165 receptor 2).                                                                                                              | 4.3             | 8.6E-12 | 2.2E-05           |
| DMXL2   | ENSG00000104093 | Protein DmX-like 2 (Rabconnectin-3).                                                                                                                                                          | 6.0             | 9.8E-12 | 2.2E-05           |
| MPP1    | ENSG00000130830 | 55 kDa erythrocyte membrane protein (p55) (Membrane protein, palmitoylated 1).                                                                                                                | 4.9             | 1.2E-11 | 2.2E-05           |
| C3AR1   | ENSG00000171860 | C3a anaphylatoxin chemotactic receptor (C3a-R) (C3AR).                                                                                                                                        | 11.0            | 1.3E-11 | 2.2E-05           |

A tumor tolerogenic microenvironment in THRLBCL

| HGNC ID | Ensembl gene ID | Description                                                                                                                                                                                                                                             | fold difference | p-value | corrected p-value |
|---------|-----------------|---------------------------------------------------------------------------------------------------------------------------------------------------------------------------------------------------------------------------------------------------------|-----------------|---------|-------------------|
| IRAK3   | ENSG00000090376 | Interleukin-1 receptor-associated kinase 3 (EC 2.7.11.1) (IRAK-3) (IL- 1 receptor-associated kinase M) (IRAK-M).                                                                                                                                        | 11.3            | 1.6E-11 | 1.1E-05           |
| AGTRAP  | ENSG00000177674 | Type-1 angiotensin II receptor-associated protein (AT1 receptor- associated protein).                                                                                                                                                                   | 5.2             | 1.6E-11 | 2.2E-05           |
| SIGLEC7 | ENSG00000168995 | Sialic acid-binding Ig-like lectin 7 precursor (Siglec-7) (QA79 membrane protein) (Adhesion inhibitory receptor molecule 1) (AIRM-1) (p75) (D-siglec) (CDw328 antigen).                                                                                 | 6.5             | 1.7E-11 | 2.2E-05           |
| S100A9  | ENSG00000163220 | Protein S100-A9 (S100 calcium-binding protein A9) (Calgranulin-B) (Migration inhibitory factor-related protein 14) (MRP-14) (P14) (Leukocyte L1 complex heavy chain) (Calprotectin L1H subunit).                                                        | 35.5            | 1.7E-11 | 2.2E-05           |
| SCARB2  | ENSG00000138760 | Lysosome membrane protein 2 (Lysosome membrane protein II) (LIMP II) (Scavenger receptor class B member 2) (85 kDa lysosomal membrane sialoglycoprotein) (LGP85) (CD36 antigen-like 2).                                                                 | 4.4             | 1.9E-11 | 2.2E-05           |
|         | ENSG00000180672 |                                                                                                                                                                                                                                                         | 4.8             | 1.9E-11 | 2.2E-05           |
| RNF130  | ENSG00000113269 | Goliath homolog precursor (RING finger protein 130).                                                                                                                                                                                                    | 4.4             | 1.9E-11 | 2.2E-05           |
| PILRA   | ENSG00000085514 | Paired immunoglobulin-like type 2 receptor alpha precursor (Inhibitory receptor PILR-alpha) (Cell surface receptor FDF03).                                                                                                                              | 15.2            | 2.0E-11 | 2.2E-05           |
| RAB20   | ENSG00000139832 | Ras-related protein Rab-20.                                                                                                                                                                                                                             | 4.3             | 2.0E-11 | 2.2E-05           |
| TLR2    | ENSG00000137462 | Toll-like receptor 2 precursor (Toll/interleukin 1 receptor-like protein 4) (CD282 antigen).                                                                                                                                                            | 11.6            | 2.2E-11 | 1.1E-05           |
| CYBA    | ENSG00000051523 | Cytochrome b-245 light chain (p22 phagocyte B-cytochrome) (Neutrophil cytochrome b 22 kDa polypeptide) (p22-phox) (p22phox) (Cytochrome b(558) alpha chain) (Cytochrome b558 subunit alpha) (Superoxide- generating NADPH oxidase light chain subunit). | 1.6             | 2.7E-11 | 2.2E-05           |

A tumor tolerogenic microenvironment in THRLBCL

| HGNC ID | Ensembl gene ID | Description                                                                                                                                                                                        | fold difference | p-value | corrected p-value |
|---------|-----------------|----------------------------------------------------------------------------------------------------------------------------------------------------------------------------------------------------|-----------------|---------|-------------------|
| CD63    | ENSG00000135404 | CD63 antigen (Melanoma-associated antigen ME491) (Lysosome-associated membrane glycoprotein 3) (LAMP-3) (Ocular melanoma-associated antigen) (OMA81H) (Granulophysin) (Tetraspanin-30) (Tspan-30). | 2.6             | 2.8E-11 | 2.2E-05           |
| HEXA    | ENSG00000140488 | Beta-hexosaminidase alpha chain precursor (EC 3.2.1.52) (N-acetyl- beta-glucosaminidase) (Beta-N-acetylhexosaminidase) (Hexosaminidase A).                                                         | 2.2             | 2.9E-11 | 2.2E-05           |
| SAT     | ENSG00000130066 | Diamine acetyltransferase 1 (EC 2.3.1.57) (Spermidine/spermine N(1)-acetyltransferase 1) (SSAT) (SSAT-1) (Putrescine acetyltransferase) (Polyamine N-acetyltransferase 1).                         | 2.7             | 3.3E-11 | 2.2E-05           |
| GSTO1   | ENSG00000148834 | Glutathione transferase omega-1 (EC 2.5.1.18) (GSTO 1-1).                                                                                                                                          | 2.3             | 3.5E-11 | 2.2E-05           |
| TPD52L2 | ENSG00000101150 | Tumor protein D54 (hD54) (Tumor protein D52-like 2).                                                                                                                                               | 1.9             | 3.6E-11 | 2.2E-05           |
| TLR1    | ENSG00000174125 | Toll-like receptor 1 precursor (Toll/interleukin-1 receptor-like protein) (TIL) (CD281 antigen).                                                                                                   | 3.1             | 4.4E-11 | 2.2E-05           |
| CSF3R   | ENSG00000119535 | Granulocyte colony-stimulating factor receptor precursor (G-CSF-R) (CD114 antigen).                                                                                                                | 9.7             | 4.4E-11 | 2.2E-05           |
| PNKD    | ENSG00000127838 | myofibrillogenesis regulator 1 isoform 2                                                                                                                                                           | 6.3             | 4.6E-11 | 2.2E-05           |
|         | ENSG00000163694 |                                                                                                                                                                                                    | 5.4             | 5.8E-11 | 2.2E-05           |
| SLC8A1  | ENSG00000183023 | Sodium/calcium exchanger 1 precursor (Na <sup>+</sup> )/Ca <sup>2+</sup> -exchange protein 1).                                                                                                     | 12.9            | 6.1E-11 | 3.2E-05           |
| CD33    | ENSG00000105383 | Myeloid cell surface antigen CD33 precursor (Siglec-3) (gp67).                                                                                                                                     | 21.4            | 6.7E-11 | 3.2E-05           |
| TYROBP  | ENSG00000011600 | TYRO protein tyrosine kinase-binding protein precursor (DNAX- activation protein 12) (Killer-activating receptor-associated protein).                                                              | 6.4             | 7.1E-11 | 2.2E-05           |
| TSPAN4  | ENSG00000177769 | Tetraspanin-4 (Tspan-4) (Transmembrane 4 superfamily member 7) (Novel antigen 2) (NAG-2).                                                                                                          | 3.9             | 7.2E-11 | 2.2E-05           |

A tumor tolerogenic microenvironment in THRLBCL

| HGNC ID  | Ensembl gene ID | Description                                                                                                                                                                                                                                       | fold difference | p-value | corrected p-value |
|----------|-----------------|---------------------------------------------------------------------------------------------------------------------------------------------------------------------------------------------------------------------------------------------------|-----------------|---------|-------------------|
| KCNE3    | ENSG00000175538 | Potassium voltage-gated channel subfamily E member 3 (Minimum potassium ion channel-related peptide 2) (Potassium channel subunit beta MiRP2) (MinK-related peptide 2).                                                                           | 5.2             | 9.1E-11 | 3.2E-05           |
| HTATIP2  | ENSG00000109854 | Oxidoreductase HTATIP2 (EC 1.1.1.-) (HIV-1 TAT-interactive protein 2) (30 kDa HIV-1 TAT-interacting protein).                                                                                                                                     | 1.9             | 1.0E-10 | 2.2E-05           |
| LILRB1   | ENSG00000104972 | Leukocyte immunoglobulin-like receptor subfamily B member 1 precursor (Leukocyte immunoglobulin-like receptor 1) (LIR-1) (Immunoglobulin-like transcript 2) (ILT-2) (Monocyte/macrophage immunoglobulin-like receptor 7) (MIR-7) (CD85j antigen). | 4.7             | 1.1E-10 | 2.2E-05           |
|          | ENSG00000074842 | Uncharacterized protein C19orf10 precursor (Stromal cell-derived growth factor SF20) (Interleukin-25) (IL-25).                                                                                                                                    | 1.7             | 1.1E-10 | 3.2E-05           |
| CCR1     | ENSG00000163823 | C-C chemokine receptor type 1 (C-C CKR-1) (CC-CKR-1) (CCR-1) (CCR1) (Macrophage inflammatory protein 1-alpha receptor) (MIP-1alpha-R) (RANTES-R) (HM145) (LD78 receptor) (CD191 antigen).                                                         | 10.4            | 1.2E-10 | 2.2E-05           |
| MLSTD1   | ENSG00000064763 | male sterility domain containing 1                                                                                                                                                                                                                | 4.4             | 1.2E-10 | 3.2E-05           |
| CREG1    | ENSG00000143162 | CREG1 protein precursor (Cellular repressor of E1A-stimulated genes 1).                                                                                                                                                                           | 3.6             | 1.3E-10 | 3.2E-05           |
| ZNF438   | ENSG00000183621 | ZNF438 transcript variant 3                                                                                                                                                                                                                       | 4.1             | 1.3E-10 | 3.2E-05           |
| SERPINA1 | ENSG00000197249 | Alpha-1-antitrypsin precursor (Alpha-1 protease inhibitor) (Alpha-1- antiproteinase).                                                                                                                                                             | 7.1             | 1.5E-10 | 3.2E-05           |
| LAP3     | ENSG00000002549 | Cytosol aminopeptidase (EC 3.4.11.1) (Leucine aminopeptidase) (LAP) (Leucyl aminopeptidase) (Proline aminopeptidase) (EC 3.4.11.5) (Prolyl aminopeptidase) (Peptidase S).                                                                         | 2.7             | 1.5E-10 | 3.2E-05           |
| MXD1     | ENSG00000059728 | MAD protein (MAX dimerizer) (MAX dimerization protein 1).                                                                                                                                                                                         | 3.8             | 1.5E-10 | 3.2E-05           |
| PYCARD   | ENSG00000103490 | Apoptosis-associated speck-like protein containing a CARD (hASC) (PYD and CARD domain containing protein) (Target of methylation-induced silencing 1) (Caspase recruitment domain protein 5).                                                     | 2.4             | 1.5E-10 | 3.2E-05           |



A tumor tolerogenic microenvironment in THRLBCL

| HGNC ID | Ensembl gene ID | Description                                                                                                                                                             | fold difference | p-value | corrected p-value |
|---------|-----------------|-------------------------------------------------------------------------------------------------------------------------------------------------------------------------|-----------------|---------|-------------------|
| EPB41L3 | ENSG00000082397 | Band 4.1-like protein 3 (4.1B) (Differentially expressed in adenocarcinoma of the lung protein 1) (DAL-1).                                                              | 5.0             | 1.6E-10 | 3.2E-05           |
| STAT1   | ENSG00000115415 | Signal transducer and activator of transcription 1-alpha/beta (Transcription factor ISGF-3 components p91/p84).                                                         | 1.6             | 1.6E-10 | 3.2E-05           |
| ALDH1A1 | ENSG00000165092 | Retinal dehydrogenase 1 (EC 1.2.1.36) (RaIDH1) (RALDH 1) (Aldehyde dehydrogenase family 1 member A1) (Aldehyde dehydrogenase, cytosolic) (ALHDII) (ALDH-E1).            | 6.6             | 1.9E-10 | 3.2E-05           |
| ARRB1   | ENSG00000137486 | Beta-arrestin-1 (Arrestin, beta 1).                                                                                                                                     | 9.2             | 2.0E-10 | 3.2E-05           |
| ICAM1   | ENSG00000090339 | Intercellular adhesion molecule 1 precursor (ICAM-1) (Major group rhinovirus receptor) (CD54 antigen).                                                                  | 4.8             | 2.2E-10 | 3.2E-05           |
| SLC7A7  | ENSG00000155465 | Y+L amino acid transporter 1 (y(+)-L-type amino acid transporter 1) (y+LAT-1) (Y+LAT1) (Monocyte amino acid permease 2) (MOP-2).                                        | 5.1             | 2.2E-10 | 3.2E-05           |
| SNX10   | ENSG00000086300 | Sorting nexin-10.                                                                                                                                                       | 9.3             | 2.2E-10 | 3.2E-05           |
| MOSPD2  | ENSG00000130150 | Motile sperm domain-containing protein 2.                                                                                                                               | 2.0             | 2.3E-10 | 3.2E-05           |
| IDH1    | ENSG00000138413 | Isocitrate dehydrogenase [NADP] cytoplasmic (EC 1.1.1.42) (Cytosolic NADP-isocitrate dehydrogenase) (Oxalosuccinate decarboxylase) (IDH) (NADP(+)-specific ICDH) (IDP). | 3.4             | 2.4E-10 | 3.2E-05           |
| SECTM1  | ENSG00000141574 | Secreted and transmembrane protein 1 precursor (Protein K12).                                                                                                           | 9.8             | 2.4E-10 | 2.2E-05           |
| FOSL2   | ENSG00000075426 | Fos-related antigen 2.                                                                                                                                                  | 4.7             | 2.4E-10 | 2.2E-05           |
| BST1    | ENSG00000109743 | ADP-ribosyl cyclase 2 precursor (EC 3.2.2.5) (Cyclic ADP-ribose hydrolase 2) (cADPr hydrolase 2) (Bone marrow stromal antigen 1) (BST- 1) (CD157 antigen).              | 6.0             | 2.7E-10 | 3.2E-05           |
| GYG1    | ENSG00000163754 | Glycogenin-1 (EC 2.4.1.186).                                                                                                                                            | 2.3             | 2.7E-10 | 3.2E-05           |
| MSRB2   | ENSG00000148450 | Methionine-R-sulfoxide reductase B2 (EC 1.8.4.-).                                                                                                                       | 2.8             | 2.8E-10 | 3.2E-05           |

A tumor tolerogenic microenvironment in THRLBCL

| HGNC ID  | Ensembl gene ID | Description                                                                                                                                                                                                                                                   | fold difference | p-value | corrected p-value |
|----------|-----------------|---------------------------------------------------------------------------------------------------------------------------------------------------------------------------------------------------------------------------------------------------------------|-----------------|---------|-------------------|
| CPNE8    | ENSG00000139117 | Copine-8 (Copine VIII).                                                                                                                                                                                                                                       | 3.5             | 2.8E-10 | 3.2E-05           |
|          | ENSG00000176778 |                                                                                                                                                                                                                                                               | 1.9             | 3.2E-10 | 3.2E-05           |
| PRDX1    | ENSG00000117450 | Peroxiredoxin-1 (EC 1.11.1.15) (Thioredoxin peroxidase 2) (Thioredoxin-dependent peroxide reductase 2) (Proliferation-associated protein PAG) (Natural killer cell-enhancing factor A) (NKEF-A).                                                              | 2.3             | 3.8E-10 | 3.2E-05           |
| C14orf58 | ENSG00000119686 | Feline leukemia virus subgroup C receptor-related protein 2 (Calcium- chelate transporter) (CCT).                                                                                                                                                             | 5.2             | 3.9E-10 | 3.2E-05           |
| NPL      | ENSG00000135838 | N-acetylneuraminate pyruvate lyase                                                                                                                                                                                                                            | 4.2             | 4.0E-10 | 3.2E-05           |
| CD14     | ENSG00000170458 | Monocyte differentiation antigen CD14 precursor (Myeloid cell-specific leucine-rich glycoprotein) [Contains: Monocyte differentiation antigen CD14, urinary form; Monocyte differentiation antigen CD14, membrane- bound form].                               | 9.2             | 4.0E-10 | 2.2E-05           |
| APOL6    | ENSG00000170420 | Apolipoprotein-L6 (Apolipoprotein L-VI) (ApoL-VI).                                                                                                                                                                                                            | 3.3             | 4.1E-10 | 2.2E-05           |
| PLSCR1   | ENSG00000188313 | Phospholipid scramblase 1 (PL scramblase 1) (Ca(2+)-dependent phospholipid scramblase 1) (Erythrocyte phospholipid scramblase) (MmTRA1b).                                                                                                                     | 2.5             | 4.3E-10 | 3.2E-05           |
| RILP     | ENSG00000167705 | Rab-interacting lysosomal protein.                                                                                                                                                                                                                            | 2.9             | 4.4E-10 | 3.2E-05           |
| VAMP8    | ENSG00000118640 | Vesicle-associated membrane protein 8 (VAMP-8) (Endobrevin) (EDB).                                                                                                                                                                                            | 1.8             | 4.5E-10 | 3.2E-05           |
| S100A8   | ENSG00000143546 | Protein S100-A8 (S100 calcium-binding protein A8) (Calgranulin-A) (Migration inhibitory factor-related protein 8) (MRP-8) (Cystic fibrosis antigen) (CFAG) (P8) (Leukocyte L1 complex light chain) (Calprotectin L1L subunit) (Urinary stone protein band A). | 40.4            | 4.6E-10 | 2.2E-05           |
| PLXDC2   | ENSG00000120594 | Plexin domain-containing protein 2 precursor (Tumor endothelial marker 7-related protein).                                                                                                                                                                    | 15.9            | 4.6E-10 | 1.1E-05           |
| RNF13    | ENSG00000082996 | RING finger protein 13.                                                                                                                                                                                                                                       | 2.5             | 4.7E-10 | 3.2E-05           |

A tumor tolerogenic microenvironment in THRLBCL

| HGNC ID | Ensembl gene ID | Description                                                                                                                                                                                                                                        | fold difference | p-value | corrected p-value |
|---------|-----------------|----------------------------------------------------------------------------------------------------------------------------------------------------------------------------------------------------------------------------------------------------|-----------------|---------|-------------------|
| ACP2    | ENSG00000134575 | Lysosomal acid phosphatase precursor (EC 3.1.3.2) (LAP).                                                                                                                                                                                           | 4.1             | 4.7E-10 | 4.3E-05           |
| PLD3    | ENSG00000105223 | phospholipase D3 isoform 1                                                                                                                                                                                                                         | 3.8             | 4.7E-10 | 3.2E-05           |
| TIMP2   | ENSG00000035862 | Metalloproteinase inhibitor 2 precursor (TIMP-2) (Tissue inhibitor of metalloproteinases 2) (CSC-21K).                                                                                                                                             | 7.2             | 4.9E-10 | 5.4E-05           |
| SGK3    | ENSG00000104205 | Serine/threonine-protein kinase Sgk3 (EC 2.7.11.1) (Serum/glucocorticoid-regulated kinase 3) (Serum/glucocorticoid- regulated kinase-like).                                                                                                        | 2.4             | 5.0E-10 | 5.4E-05           |
| SIGLEC9 | ENSG00000129450 | Sialic acid-binding Ig-like lectin 9 precursor (Siglec-9) (Protein FOAP-9).                                                                                                                                                                        | 14.5            | 5.3E-10 | 1.1E-05           |
| B4GALT5 | ENSG00000158470 | Beta-1,4-galactosyltransferase 5 (EC 2.4.1.-) (Beta-1,4-GalTase 5) (Beta4Gal-T5) (b4Gal-T5) (UDP-galactose:beta-N-acetylglucosamine beta- 1,4-galactosyltransferase 5) (UDP-Gal:beta-GlcNAc beta-1,4- galactosyltransferase 5) (Beta-1,4-GalT II). | 4.4             | 5.3E-10 | 2.2E-05           |
| SOD2    | ENSG00000112096 | Superoxide dismutase [Mn], mitochondrial precursor (EC 1.15.1.1).                                                                                                                                                                                  | 5.7             | 5.4E-10 | 3.2E-05           |
| FCGR3B  | ENSG00000162747 | Low affinity immunoglobulin gamma Fc region receptor III-B precursor (IgG Fc receptor III-1) (Fc-gamma RIII-beta) (Fc-gamma RIIIb) (FcRIIIb) (Fc-gamma RIII) (FcRIII) (FcR-10) (CD16b antigen).                                                    | 25.7            | 5.5E-10 | 1.1E-05           |
| LRRC25  | ENSG00000175489 | Leucine-rich repeat-containing protein 25 precursor (Monocyte and plasmacytoid-activated protein).                                                                                                                                                 | 15.7            | 5.5E-10 | 5.4E-05           |
|         | ENSG00000052795 | CDNA FLJ12906 fis, clone NT2RP2004373.                                                                                                                                                                                                             | 3.7             | 5.7E-10 | 5.4E-05           |
| GNS     | ENSG00000135677 | N-acetylglucosamine-6-sulfatase precursor (EC 3.1.6.14) (G6S) (Glucosamine-6-sulfatase).                                                                                                                                                           | 4.5             | 5.9E-10 | 3.2E-05           |
| RNPEP   | ENSG00000176393 | Aminopeptidase B (EC 3.4.11.6) (Ap-B) (Arginyl aminopeptidase) (Arginine aminopeptidase).                                                                                                                                                          | 2.0             | 6.0E-10 | 6.5E-05           |

A tumor tolerogenic microenvironment in THRLBCL

| HGNC ID | Ensembl gene ID | Description                                                                                                                                                                                  | fold difference | p-value | corrected p-value |
|---------|-----------------|----------------------------------------------------------------------------------------------------------------------------------------------------------------------------------------------|-----------------|---------|-------------------|
| CXCL16  | ENSG00000161921 | Small inducible cytokine B16 precursor (Transmembrane chemokine CXCL16) (SR-PSOX) (Scavenger receptor for phosphatidylserine and oxidized low density lipoprotein).                          | 7.9             | 6.2E-10 | 3.2E-05           |
| ANKRD22 | ENSG00000152766 | Ankyrin repeat domain-containing protein 22.                                                                                                                                                 | 17.4            | 6.3E-10 | 6.5E-05           |
| IFI27   | ENSG00000165949 | Interferon-alpha-induced 11.5 kDa protein (p27) (ISG12(a) protein).                                                                                                                          | 7.9             | 6.4E-10 | 3.2E-05           |
| IFIT3   | ENSG00000119917 | Interferon-induced protein with tetratricopeptide repeats 3 (IFIT-3) (IFIT-4) (Interferon-induced 60 kDa protein) (IFI-60K) (ISG-60) (CIG49) (Retinoic acid-induced gene G protein) (RIG-G). | 7.1             | 7.7E-10 | 5.4E-05           |
|         | ENSG00000135124 | P2X purinoceptor 4 (ATP receptor) (P2X4) (Purinergic receptor).                                                                                                                              | 2.5             | 7.7E-10 | 6.5E-05           |
| MEGF9   | ENSG00000106780 | Multiple epidermal growth factor-like domains 9 precursor (EGF-like domain-containing protein 5) (Multiple EGF-like domain protein 5).                                                       | 2.5             | 7.8E-10 | 6.5E-05           |
| EFHD2   | ENSG00000142634 | EF-hand domain-containing protein 2 (Swiprosin-1).                                                                                                                                           | 3.1             | 8.0E-10 | 6.5E-05           |
| C1orf85 | ENSG00000198715 | kidney predominant protein NCU-G1                                                                                                                                                            | 3.2             | 8.5E-10 | 3.2E-05           |
| LAMP2   | ENSG00000005893 | Lysosome-associated membrane glycoprotein 2 precursor (LAMP-2) (CD107b antigen).                                                                                                             | 3.8             | 8.6E-10 | 6.5E-05           |
| CTSB    | ENSG00000164733 | Cathepsin B precursor (EC 3.4.22.1) (Cathepsin B1) (APP secretase) (APPS) [Contains: Cathepsin B light chain; Cathepsin B heavy chain].                                                      | 6.1             | 8.6E-10 | 2.2E-05           |
| DLL1    | ENSG00000198719 | Delta-like protein 1 precursor (Drosophila Delta homolog 1) (Delta1) (H-Delta-1).                                                                                                            | 5.1             | 8.7E-10 | 5.4E-05           |
| C2      | ENSG00000204364 | Complement C2 precursor (EC 3.4.21.43) (C3/C5 convertase) [Contains: Complement C2b fragment; Complement C2a fragment].                                                                      | 10.9            | 8.8E-10 | 3.2E-05           |
| HNMT    | ENSG00000150540 | Histamine N-methyltransferase (EC 2.1.1.8) (HMT).                                                                                                                                            | 6.8             | 1.0E-09 | 3.2E-05           |
| AYTL1   | ENSG00000087253 |                                                                                                                                                                                              | 10.7            | 1.1E-09 | 8.7E-05           |

A tumor tolerogenic microenvironment in THRLBCL

| HGNC ID | Ensembl gene ID | Description                                                                                                                                                                                                                                             | fold difference | p-value | corrected p-value |
|---------|-----------------|---------------------------------------------------------------------------------------------------------------------------------------------------------------------------------------------------------------------------------------------------------|-----------------|---------|-------------------|
| SLC31A1 | ENSG00000136868 | High-affinity copper uptake protein 1 (hCTR1) (Copper transporter 1) (Solute carrier family 31 member 1).                                                                                                                                               | 8.6             | 1.1E-09 | 8.7E-05           |
| CCL8    | ENSG00000108700 | Small inducible cytokine A8 precursor (CCL8) (Monocyte chemotactic protein 2) (MCP-2) (Monocyte chemoattractant protein 2) (HC14) [Contains: MCP-2(6-76)].                                                                                              | 143.5           | 1.1E-09 | 6.5E-05           |
|         | ENSG00000121316 |                                                                                                                                                                                                                                                         | 4.3             | 1.1E-09 | 6.5E-05           |
| ASAH1   | ENSG00000104763 | Acid ceramidase precursor (EC 3.5.1.23) (Acylsphingosine deacylase) (N-acylsphingosine amidohydrolase) (AC) (Putative 32 kDa heart protein) (PHP32) [Contains: Acid ceramidase subunit alpha; Acid ceramidase subunit beta].                            | 2.0             | 1.1E-09 | 3.2E-05           |
| P4HA1   | ENSG00000122884 | Prolyl 4-hydroxylase alpha-1 subunit precursor (EC 1.14.11.2) (4-PH alpha-1) (Procollagen-proline,2-oxoglutarate-4-dioxygenase alpha-1 subunit).                                                                                                        | 2.8             | 1.2E-09 | 6.5E-05           |
| PSAP    | ENSG00000197746 | Proactivator polypeptide precursor [Contains: Saposin A (Protein A); Saposin B-Val; Saposin B (Sphingolipid activator protein 1) (SAP-1) (Cerebroside sulfate activator) (CSAct) (Dispersin) (Sulfatide/GM1 activator); Saposin C (Co-beta-glucosidase) | 2.2             | 1.2E-09 | 8.7E-05           |
| IL18BP  | ENSG00000137496 | Interleukin-18-binding protein precursor (IL-18BP) (Tadekinig-alfa).                                                                                                                                                                                    | 6.4             | 1.2E-09 | 3.2E-05           |
| RGL1    | ENSG00000143344 | Ral guanine nucleotide dissociation stimulator-like 1 (RalGDS-like 1).                                                                                                                                                                                  | 4.6             | 1.3E-09 | 8.7E-05           |
| DNPEP   | ENSG00000123992 | Aspartyl aminopeptidase (EC 3.4.11.21).                                                                                                                                                                                                                 | 1.6             | 1.3E-09 | 3.2E-05           |
| STX12   | ENSG00000117758 | Syntaxin-12.                                                                                                                                                                                                                                            | 2.2             | 1.3E-09 | 5.4E-05           |
| IFNGR2  | ENSG00000159128 | Interferon-gamma receptor beta chain precursor (Interferon-gamma receptor accessory factor 1) (AF-1) (Interferon-gamma transducer 1).                                                                                                                   | 2.8             | 1.3E-09 | 3.2E-05           |
| FPR1    | ENSG00000171051 | fMet-Leu-Phe receptor (fMLP receptor) (N-formyl peptide receptor) (FPR) (N-formylpeptide chemoattractant receptor).                                                                                                                                     | 6.7             | 1.4E-09 | 6.5E-05           |
| DIRC2   | ENSG00000138463 | disrupted in renal carcinoma 2                                                                                                                                                                                                                          | 3.3             | 1.4E-09 | 9.7E-05           |

A tumor tolerogenic microenvironment in THRLBCL

| HGNC ID  | Ensembl gene ID | Description                                                                                                                                                                                                                                         | fold difference | p-value | corrected p-value |
|----------|-----------------|-----------------------------------------------------------------------------------------------------------------------------------------------------------------------------------------------------------------------------------------------------|-----------------|---------|-------------------|
| S100A11  | ENSG00000163191 | Protein S100-A11 (S100 calcium-binding protein A11) (Protein S100C) (Calgizzarin) (MLN 70).                                                                                                                                                         | 3.1             | 1.4E-09 | 3.2E-05           |
| LACTB    | ENSG00000103642 | Serine beta-lactamase-like protein LACTB.                                                                                                                                                                                                           | 3.2             | 1.4E-09 | 8.7E-05           |
| TLR8     | ENSG00000101916 | Toll-like receptor 8 precursor.                                                                                                                                                                                                                     | 11.5            | 1.4E-09 | 3.2E-05           |
| ADIPOR1  | ENSG00000159346 | Adiponectin receptor protein 1 (Progesterin and adipoQ receptor family member I).                                                                                                                                                                   | 1.7             | 1.5E-09 | 4.3E-05           |
| CPD      | ENSG00000108582 | Carboxypeptidase D precursor (EC 3.4.17.22) (Metalloprotease D) (gp180).                                                                                                                                                                            | 2.8             | 1.6E-09 | 9.7E-05           |
| CD80     | ENSG00000121594 | T-lymphocyte activation antigen CD80 precursor (Activation B7-1 antigen) (CTLA-4 counter-receptor B7.1) (B7) (BB1).                                                                                                                                 | 3.4             | 1.7E-09 | 8.7E-05           |
| ALDH3B1  | ENSG00000006534 | Aldehyde dehydrogenase 3B1 (EC 1.2.1.5) (Aldehyde dehydrogenase 7).                                                                                                                                                                                 | 6.1             | 1.7E-09 | 9.7E-05           |
| LILRB2   | ENSG00000131042 | Leukocyte immunoglobulin-like receptor subfamily B member 2 precursor (Leukocyte immunoglobulin-like receptor 2) (LIR-2) (Immunoglobulin-like transcript 4) (ILT-4) (Monocyte/macrophage immunoglobulin-like receptor 10) (MIR-10) (CD85d antigen). | 17.4            | 1.7E-09 | 3.2E-05           |
| PQLC3    | ENSG00000162976 | PQ loop repeat-containing protein 3 precursor.                                                                                                                                                                                                      | 2.1             | 1.8E-09 | 6.5E-05           |
| C1QB     | ENSG00000173369 | Complement C1q subcomponent subunit B precursor.                                                                                                                                                                                                    | 10.6            | 2.0E-09 | 2.2E-05           |
| TNFSF13B | ENSG00000102524 | Tumor necrosis factor ligand superfamily member 13B (TNF- and APOL- related leukocyte expressed ligand 1) (TALL-1) (B lymphocyte stimulator) (BLyS) (B cell-activating factor) (BAFF) (Dendritic cell- derived TNF-like molecule) (CD257 antigen)   | 3.9             | 2.0E-09 | 8.7E-05           |
| HK3      | ENSG00000160883 | Hexokinase-3 (EC 2.7.1.1) (Hexokinase type III) (HK III).                                                                                                                                                                                           | 14.7            | 2.1E-09 | 3.2E-05           |
| CTSS     | ENSG00000163131 | Cathepsin S precursor (EC 3.4.22.27).                                                                                                                                                                                                               | 2.9             | 2.1E-09 | 9.7E-05           |
|          | ENSG00000122597 | Putative S100 calcium-binding protein H_NH0456N16.1.                                                                                                                                                                                                | 2.7             | 2.2E-09 | 3.2E-05           |

A tumor tolerogenic microenvironment in THRLBCL

| HGNC ID  | Ensembl gene ID | Description                                                                                                                                                                                                                             | fold difference | p-value | corrected p-value |
|----------|-----------------|-----------------------------------------------------------------------------------------------------------------------------------------------------------------------------------------------------------------------------------------|-----------------|---------|-------------------|
| NR1H3    | ENSG00000025434 | Oxysterols receptor LXR-alpha (Liver X receptor alpha) (Nuclear orphan receptor LXR-alpha).                                                                                                                                             | 3.7             | 2.2E-09 | 8.7E-05           |
| SERPING1 | ENSG00000149131 | Plasma protease C1 inhibitor precursor (C1 Inh) (C1Inh).                                                                                                                                                                                | 5.7             | 2.2E-09 | 6.5E-05           |
|          | ENSG00000120306 | putative nuclear protein ORF1-FL49                                                                                                                                                                                                      | 2.2             | 2.2E-09 | 5.4E-05           |
| AKR1A1   | ENSG00000117448 | Alcohol dehydrogenase [NADP+] (EC 1.1.1.2) (Aldehyde reductase) (Aldo- keto reductase family 1 member A1).                                                                                                                              | 2.3             | 2.3E-09 | 9.7E-05           |
| KCNJ10   | ENSG00000177807 | ATP-sensitive inward rectifier potassium channel 10 (Potassium channel, inwardly rectifying subfamily J member 10) (Inward rectifier K(+) channel Kir1.2) (ATP-dependent inwardly rectifying potassium channel Kir4.1).                 | 14.0            | 2.4E-09 | 9.7E-05           |
| AP1S2    | ENSG00000182287 | AP-1 complex subunit sigma-2 (Adapter-related protein complex 1 sigma- 1B subunit) (Sigma-adaptin 1B) (Adaptor protein complex AP-1 sigma-1B subunit) (Golgi adaptor HA1/AP1 adaptin sigma-1B subunit)                                  | 2.3             | 2.4E-09 | 9.7E-05           |
| PFKFB3   | ENSG00000170525 | 6-phosphofructo-2-kinase/fructose-2,6-biphosphatase 3 (6PF-2-K/Fru- 2,6-P2ASE brain/placenta-type isozyme) (iPFK-2) (NY-REN-56 antigen) [Includes: 6-phosphofructo-2-kinase (EC 2.7.1.105); Fructose-2,6- biphosphatase (EC 3.1.3.46)]. | 4.7             | 2.4E-09 | 9.7E-05           |
| TLR4     | ENSG00000136869 | Toll-like receptor 4 precursor (hToll) (CD284 antigen).                                                                                                                                                                                 | 4.0             | 2.5E-09 | 9.7E-05           |
| MRAS     | ENSG00000158186 | Ras-related protein M-Ras (Ras-related protein R-Ras3).                                                                                                                                                                                 | 3.1             | 2.5E-09 | 5.4E-05           |
| CD86     | ENSG00000114013 | T-lymphocyte activation antigen CD86 precursor (Activation B7-2 antigen) (CTLA-4 counter-receptor B7.2) (B70) (FUN-1) (BU63).                                                                                                           | 3.8             | 2.5E-09 | 9.7E-05           |
| DCTN4    | ENSG00000132912 | Dynactin subunit 4 (Dynactin subunit p62).                                                                                                                                                                                              | 2.0             | 2.6E-09 | 9.7E-05           |
| SCPEP1   | ENSG00000121064 | Retinoid-inducible serine carboxypeptidase precursor (EC 3.4.16.-) (Serine carboxypeptidase 1).                                                                                                                                         | 5.1             | 2.7E-09 | 9.7E-05           |

A tumor tolerogenic microenvironment in THRLBCL

| HGNC ID | Ensembl gene ID | Description                                                                                                                                                                                                             | fold difference | p-value | corrected p-value |
|---------|-----------------|-------------------------------------------------------------------------------------------------------------------------------------------------------------------------------------------------------------------------|-----------------|---------|-------------------|
| ADM     | ENSG00000148926 | ADM precursor [Contains: Adrenomedullin (AM); Proadrenomedullin N-20 terminal peptide (ProAM-N20) (ProAM N-terminal 20 peptide) (PAMP)].                                                                                | 6.5             | 2.9E-09 | 9.7E-05           |
|         | ENSG00000134470 | Interleukin-15 receptor alpha chain precursor (IL-15R-alpha) (IL- 15RA).                                                                                                                                                | 4.5             | 3.1E-09 | 6.5E-05           |
| CD163   | ENSG00000177575 | Scavenger receptor cysteine-rich type 1 protein M130 precursor (CD163 antigen) (Hemoglobin scavenger receptor) [Contains: Soluble CD163 (sCD163)].                                                                      | 50.5            | 3.1E-09 | 2.2E-05           |
| M6PR    | ENSG00000003056 | Cation-dependent mannose-6-phosphate receptor precursor (CD Man-6-P receptor) (CD-MPR) (46 kDa mannose 6-phosphate receptor) (MPR 46).                                                                                  | 1.8             | 3.2E-09 | 8.7E-05           |
| COMMD9  | ENSG00000110442 | COMM domain-containing protein 9.                                                                                                                                                                                       | 1.6             | 3.4E-09 | 9.7E-05           |
| YIF1B   | ENSG00000167645 | Yip1 interacting factor homolog B isoform 2                                                                                                                                                                             | 1.9             | 3.4E-09 | 9.7E-05           |
| CD300LF | ENSG00000186074 | NK inhibitory receptor precursor                                                                                                                                                                                        | 5.1             | 3.5E-09 | 9.7E-05           |
| INSIG2  | ENSG00000125629 | insulin induced protein 2                                                                                                                                                                                               | 2.4             | 3.5E-09 | 3.2E-05           |
|         | ENSG00000137393 | E3 ubiquitin ligase IBRDC2 (EC 6.3.2.-) (IBR domain-containing protein 2) (p53-inducible RING finger protein).                                                                                                          | 16.6            | 3.6E-09 | 9.7E-05           |
| LILRB3  | ENSG00000186152 | Leukocyte immunoglobulin-like receptor subfamily B member 3 precursor (Leukocyte immunoglobulin-like receptor 3) (LIR-3) (Immunoglobulin-like transcript 5) (ILT-5) (Monocyte inhibitory receptor HL9) (CD85a antigen). | 4.1             | 3.6E-09 | 9.7E-05           |
| C1QA    | ENSG00000173372 | Complement C1q subcomponent subunit A precursor.                                                                                                                                                                        | 8.3             | 3.6E-09 | 2.2E-05           |
| FAM20A  | ENSG00000108950 | Protein FAM20A precursor.                                                                                                                                                                                               | 7.3             | 3.7E-09 | 9.7E-05           |
| IL1RN   | ENSG00000136689 | Interleukin-1 receptor antagonist protein precursor (IL-1ra) (IRAP) (IL1 inhibitor) (IL-1RN) (ICIL-1RA).                                                                                                                | 67.7            | 3.7E-09 | 8.7E-05           |
| GPD2    | ENSG00000115159 | Glycerol-3-phosphate dehydrogenase, mitochondrial precursor (EC 1.1.99.5) (GPD-M) (GPDH-M) (mtGPD).                                                                                                                     | 4.5             | 3.9E-09 | 9.7E-05           |



A tumor tolerogenic microenvironment in THRLBCL

| HGNC ID | Ensembl gene ID | Description                                                                                                                                                                      | fold difference | p-value | corrected p-value |
|---------|-----------------|----------------------------------------------------------------------------------------------------------------------------------------------------------------------------------|-----------------|---------|-------------------|
| MGLL    | ENSG00000074416 | Monoglyceride lipase (EC 3.1.1.23) (MGL) (HU-K5) (Lysophospholipase homolog) (Lysophospholipase-like).                                                                           | 7.1             | 3.9E-09 | 9.7E-05           |
| FTH1    | ENSG00000167996 | Ferritin heavy chain (EC 1.16.3.1) (Ferritin H subunit) (Proliferation-inducing gene 15 protein).                                                                                | 4.5             | 4.0E-09 | 9.7E-05           |
| CTNNA1  | ENSG00000044115 | Alpha-1 catenin (Cadherin-associated protein) (Alpha E-catenin) (NY- REN-13 antigen).                                                                                            | 2.0             | 4.1E-09 | 9.7E-05           |
| CSTB    | ENSG00000160213 | Cystatin B (Liver thiol proteinase inhibitor) (CPI-B) (Stefin B).                                                                                                                | 2.4             | 4.2E-09 | 9.7E-05           |
| TMBIM1  | ENSG00000135926 | Transmembrane BAX inhibitor motif-containing protein 1 (RECS1 protein homolog).                                                                                                  | 2.7             | 4.3E-09 | 1.1E-04           |
|         | ENSG00000101084 | Uncharacterized protein C20orf24 (Rab5-interacting protein) (RIP5).                                                                                                              | 2.1             | 4.5E-09 | 9.7E-05           |
| LTBR    | ENSG00000111321 | Tumor necrosis factor receptor superfamily member 3 precursor (Lymphotoxin-beta receptor) (Tumor necrosis factor receptor 2-related protein) (Tumor necrosis factor C receptor). | 4.1             | 4.5E-09 | 9.7E-05           |
| GZMA    | ENSG00000145649 | Granzyme A precursor (EC 3.4.21.78) (Cytotoxic T-lymphocyte proteinase 1) (Hanukkah factor) (H factor) (HF) (Granzyme-1) (CTL tryptase) (Fragmentin-1).                          | 5.5             | 4.5E-09 | 6.5E-05           |
| PTGER2  | ENSG00000125384 | Prostaglandin E2 receptor, EP2 subtype (Prostanoid EP2 receptor) (PGE receptor, EP2 subtype).                                                                                    | 10.6            | 4.6E-09 | 1.3E-04           |
| ZNF313  | ENSG00000124226 | Zinc finger protein 313 (RING finger protein 114).                                                                                                                               | 2.0             | 4.7E-09 | 1.3E-04           |
| PBEF1   | ENSG00000105835 | Nicotinamide phosphoribosyltransferase (EC 2.4.2.12) (NAMPRtase) (Nampt) (Pre-B cell-enhancing factor) (Pre-B-cell colony-enhancing factor 1) (Visfatin).                        | 3.7             | 4.8E-09 | 6.5E-05           |
| C1QC    | ENSG00000159189 | Complement C1q subcomponent subunit C precursor.                                                                                                                                 | 6.4             | 4.8E-09 | 3.2E-05           |
|         | ENSG00000166347 | Cytochrome b5.                                                                                                                                                                   | 2.6             | 5.2E-09 | 1.3E-04           |

A tumor tolerogenic microenvironment in THRLBCL

| HGNC ID  | Ensembl gene ID | Description                                                                                                                                                                                                                  | fold difference | p-value | corrected p-value |
|----------|-----------------|------------------------------------------------------------------------------------------------------------------------------------------------------------------------------------------------------------------------------|-----------------|---------|-------------------|
| NANS     | ENSG00000095380 | Sialic acid synthase (N-acetylneuraminase) (EC 2.5.1.56) (N-acetylneuraminic acid synthase) (N-acetylneuraminase-9-phosphate synthase) (EC 2.5.1.57) (N-acetylneuraminic acid phosphate synthase).                           | 2.3             | 5.3E-09 | 1.5E-04           |
| MGAT1    | ENSG00000131446 | Alpha-1,3-mannosyl-glycoprotein 2-beta-N-acetylglucosaminyltransferase (EC 2.4.1.101) (N-glycosyl-oligosaccharide-glycoprotein N-acetylglucosaminyltransferase I) (GNT-I) (GlcNAc-T I).                                      | 2.2             | 5.3E-09 | 1.5E-04           |
| FUCA2    | ENSG00000001036 | Plasma alpha-L-fucosidase precursor (EC 3.2.1.51) (Alpha-L-fucosidase 2) (Alpha-L-fucoside fucosyltransferase 2).                                                                                                            | 2.3             | 5.4E-09 | 9.7E-05           |
| DNASE1L1 | ENSG00000013563 | Deoxyribonuclease I-like 1 precursor (EC 3.1.21.-) (DNase I-like 1) (Muscle-specific DNase I-like) (DNase X) (XIB).                                                                                                          | 2.1             | 5.7E-09 | 1.2E-04           |
| FER1L3   | ENSG00000138119 | Myoferlin (Fer-1-like protein 3).                                                                                                                                                                                            | 13.8            | 5.7E-09 | 1.1E-04           |
| BID      | ENSG00000015475 | BH3-interacting domain death agonist (BID) (p22 BID) [Contains: BH3-interacting domain death agonist p15 (p15 BID); BH3-interacting domain death agonist p13 (p13 BID); BH3-interacting domain death agonist p11 (p11 BID)]. | 2.5             | 6.0E-09 | 1.5E-04           |
| PCBD1    | ENSG00000166228 | Pterin-4-alpha-carbinolamine dehydratase (EC 4.2.1.96) (PHS) (4-alpha-hydroxy-tetrahydropterin dehydratase) (Phenylalanine hydroxylase-stimulating protein) (Pterin carbinolamine dehydratase) (PCD)                         | 2.3             | 6.0E-09 | 1.2E-04           |
| ITFG1    | ENSG00000129636 | T-cell immunomodulatory protein precursor (Protein TIP).                                                                                                                                                                     | 1.9             | 6.0E-09 | 8.7E-05           |
| TMEM135  | ENSG00000166575 |                                                                                                                                                                                                                              | 1.7             | 6.1E-09 | 9.7E-05           |
| APOL3    | ENSG00000128284 | Apolipoprotein-L3 (Apolipoprotein L-III) (ApoL-III) (TNF-inducible protein CG12-1) (CG12_1).                                                                                                                                 | 3.8             | 6.1E-09 | 3.2E-05           |
| PVRL2    | ENSG00000130202 | Poliovirus receptor-related protein 2 precursor (Herpes virus entry mediator B) (HveB) (Nectin-2) (CD112 antigen).                                                                                                           | 4.6             | 6.1E-09 | 1.5E-04           |
| MS4A4A   | ENSG00000110079 | Membrane-spanning 4-domains subfamily A member 4A (Four-span transmembrane protein 1) (CD20 antigen-like 1).                                                                                                                 | 11.9            | 6.2E-09 | 1.4E-04           |

A tumor tolerogenic microenvironment in THRLBCL

| HGNC ID | Ensembl gene ID | Description                                                                                                                               | fold difference | p-value | corrected p-value |
|---------|-----------------|-------------------------------------------------------------------------------------------------------------------------------------------|-----------------|---------|-------------------|
| SLC38A6 | ENSG00000139974 | N system amino acid transporter NAT-1                                                                                                     | 3.9             | 6.3E-09 | 9.7E-05           |
| H2AFY   | ENSG00000113648 | Core histone macro-H2A.1 (Histone macroH2A1) (mH2A1) (H2A.y) (H2A/y) (Medulloblastoma antigen MU-MB-50.205).                              | 2.6             | 6.3E-09 | 6.5E-05           |
| TNFAIP6 | ENSG00000123610 | Tumor necrosis factor-inducible protein TSG-6 precursor (TNF- stimulated gene 6 protein) (Hyaluronate-binding protein).                   | 76.9            | 6.4E-09 | 9.7E-05           |
|         | ENSG00000188811 |                                                                                                                                           | 2.1             | 6.4E-09 | 9.7E-05           |
| MITF    | ENSG00000187098 | Microphthalmia-associated transcription factor.                                                                                           | 4.3             | 6.4E-09 | 1.6E-04           |
| CXCL10  | ENSG00000169245 | Small inducible cytokine B10 precursor (CXCL10) (10 kDa interferon- gamma-induced protein) (Gamma-IP10) (IP-10) [Contains: CXCL10(1-73)]. | 7.7             | 6.6E-09 | 1.6E-04           |
| IFNAR1  | ENSG00000142166 | Interferon-alpha/beta receptor alpha chain precursor (IFN-alpha-REC).                                                                     | 2.2             | 6.7E-09 | 9.7E-05           |
| EXOC5   | ENSG00000070367 | Exocyst complex component 5 (Exocyst complex component Sec10) (hSec10).                                                                   | 1.6             | 6.9E-09 | 9.7E-05           |
| DYNLT1  | ENSG00000146425 | Dynein light chain Tctex-type 1 (T-complex testis-specific protein 1 homolog) (Protein CW-1).                                             | 2.1             | 7.0E-09 | 9.7E-05           |
| SUCNR1  | ENSG00000198829 | Succinate receptor 1 (G-protein coupled receptor 91) (P2Y purinoceptor 1-like).                                                           | 23.9            | 7.1E-09 | 1.6E-04           |
| GPR137B | ENSG00000077585 | Integral membrane protein GPR137B (Transmembrane 7 superfamily member 1).                                                                 | 3.1             | 7.2E-09 | 9.7E-05           |
| RHEB    | ENSG00000106615 | GTP-binding protein Rheb (Ras homolog enriched in brain).                                                                                 | 1.4             | 7.3E-09 | 1.6E-04           |
| SLC17A5 | ENSG00000119899 | Sialin (Solute carrier family 17 member 5) (Sodium/sialic acid cotransporter) (AST) (Membrane glycoprotein HP59).                         | 2.6             | 7.5E-09 | 9.7E-05           |
| RAB1A   | ENSG00000138069 | Ras-related protein Rab-1A (YPT1-related protein).                                                                                        | 1.9             | 7.5E-09 | 1.3E-04           |
| VAMP5   | ENSG00000168899 | Vesicle-associated membrane protein 5 (VAMP-5) (Myobrevin).                                                                               | 4.7             | 7.6E-09 | 6.5E-05           |

A tumor tolerogenic microenvironment in THRLBCL

| HGNC ID  | Ensembl gene ID | Description                                                                                                                                                                                                                                            | fold difference | p-value | corrected p-value |
|----------|-----------------|--------------------------------------------------------------------------------------------------------------------------------------------------------------------------------------------------------------------------------------------------------|-----------------|---------|-------------------|
| SLC1A3   | ENSG00000079215 | Excitatory amino acid transporter 1 (Sodium-dependent glutamate/aspartate transporter 1) (Glial glutamate transporter) (GLAST-1).                                                                                                                      | 6.7             | 7.8E-09 | 1.4E-04           |
| TFEC     | ENSG00000105967 | transcription factor EC isoform b                                                                                                                                                                                                                      | 3.5             | 7.9E-09 | 1.2E-04           |
| CLN3     | ENSG00000188603 | Protein CLN3 (Battenin) (Batten disease protein).                                                                                                                                                                                                      | 1.5             | 7.9E-09 | 9.7E-05           |
| RAB18    | ENSG00000099246 | Ras-related protein Rab-18.                                                                                                                                                                                                                            | 1.7             | 8.0E-09 | 1.6E-04           |
| HCK      | ENSG00000101336 | Tyrosine-protein kinase HCK (EC 2.7.10.2) (p59-HCK/p60-HCK) (Hemopoietic cell kinase).                                                                                                                                                                 | 3.9             | 8.2E-09 | 1.6E-04           |
| ABCA1    | ENSG00000165029 | ATP-binding cassette sub-family A member 1 (ATP-binding cassette transporter 1) (ATP-binding cassette 1) (ABC-1) (Cholesterol efflux regulatory protein).                                                                                              | 3.9             | 8.4E-09 | 9.7E-05           |
| RDX      | ENSG00000137710 | Radixin.                                                                                                                                                                                                                                               | 3.9             | 8.5E-09 | 3.2E-05           |
| SLC39A11 | ENSG00000133195 | solute carrier family 39 (metal ion transporter), member 11                                                                                                                                                                                            | 3.3             | 8.6E-09 | 9.7E-05           |
| CYBB     | ENSG00000165168 | Cytochrome b-245 heavy chain (p22 phagocyte B-cytochrome) (Neutrophil cytochrome b 91 kDa polypeptide) (CGD91-phox) (gp91-phox) (gp91-1) (Heme-binding membrane glycoprotein gp91phox) (Cytochrome b(558) subunit beta) (Cytochrome b558 subunit beta) | 2.8             | 8.8E-09 | 2.3E-04           |
| RIN2     | ENSG00000132669 | Ras and Rab interactor 2 (Ras interaction/interference protein 2) (Ras inhibitor JC265) (Ras association domain family 4).                                                                                                                             | 4.6             | 9.0E-09 | 2.3E-04           |
| MT1L     | ENSG00000169715 | Metallothionein-1E (MT-1E) (Metallothionein-IE) (MT-IE).                                                                                                                                                                                               | 22.4            | 9.9E-09 | 1.2E-04           |
| GNG10    | ENSG00000059769 | Guanine nucleotide-binding protein G(I)/G(S)/G(O) gamma-10 subunit precursor.                                                                                                                                                                          | 1.9             | 1.0E-08 | 2.4E-04           |
| IBRDC1   | ENSG00000146373 | IBR domain-containing protein 1.                                                                                                                                                                                                                       | 4.8             | 1.0E-08 | 3.2E-05           |
|          | ENSG00000043822 | phosphatidylinositol 4-kinase type II                                                                                                                                                                                                                  | 3.2             | 1.1E-08 | 2.7E-04           |
| UBADC1   | ENSG00000130560 | ubiquitin associated domain containing 1                                                                                                                                                                                                               | 1.5             | 1.1E-08 | 2.8E-04           |

A tumor tolerogenic microenvironment in THRLBCL

| HGNC ID | Ensembl gene ID | Description                                                                                                                                                                        | fold difference | p-value | corrected p-value |
|---------|-----------------|------------------------------------------------------------------------------------------------------------------------------------------------------------------------------------|-----------------|---------|-------------------|
| TNFAIP2 | ENSG00000185215 | Tumor necrosis factor, alpha-induced protein 2 (Primary response gene B94 protein).                                                                                                | 5.3             | 1.2E-08 | 2.9E-04           |
| DOCK4   | ENSG00000128512 | Dedicator of cytokinesis protein 4.                                                                                                                                                | 5.9             | 1.2E-08 | 2.9E-04           |
|         | ENSG00000204437 |                                                                                                                                                                                    | 9.0             | 1.2E-08 | 1.5E-04           |
| SH3GLB1 | ENSG00000097033 | SH3 domain GRB2-like protein B1 (EC 2.3.1.-) (Endophilin B1) (Bax- interacting factor 1) (Bif-1).                                                                                  | 1.6             | 1.3E-08 | 2.8E-04           |
| SLC15A3 | ENSG00000110446 | solute carrier family 15, member 3                                                                                                                                                 | 3.6             | 1.3E-08 | 9.7E-05           |
| SLC30A1 | ENSG00000170385 | Zinc transporter 1 (ZnT-1) (Solute carrier family 30 member 1).                                                                                                                    | 10.1            | 1.3E-08 | 3.0E-04           |
| TMED7   | ENSG00000134970 | Transmembrane emp24 domain-containing protein 7 precursor.                                                                                                                         | 3.6             | 1.4E-08 | 1.9E-04           |
| DUSP3   | ENSG00000108861 | Dual specificity protein phosphatase 3 (EC 3.1.3.48) (EC 3.1.3.16) (Dual specificity protein phosphatase VHR).                                                                     | 5.1             | 1.4E-08 | 1.2E-04           |
| NCOA4   | ENSG00000138293 | Nuclear receptor coactivator 4 (NCoA-4) (70 kDa androgen receptor coactivator) (70 kDa AR-activator) (Ret-activating protein ELE1).                                                | 1.6             | 1.4E-08 | 2.9E-04           |
| PICALM  | ENSG00000073921 | Phosphatidylinositol-binding clathrin assembly protein (Clathrin assembly lymphoid myeloid leukemia protein).                                                                      | 2.2             | 1.4E-08 | 3.2E-04           |
| DYSF    | ENSG00000135636 | Dysferlin (Dystrophy-associated fer-1-like protein) (Fer-1-like protein 1).                                                                                                        | 5.0             | 1.4E-08 | 3.2E-05           |
| SIRPB1  | ENSG00000101307 | Signal-regulatory protein beta-1 precursor (SIRP-beta-1) (CD172b antigen).                                                                                                         | 6.5             | 1.4E-08 | 1.3E-04           |
| GLRX    | ENSG00000173221 | Glutaredoxin-1 (Thioltransferase-1) (TTase-1).                                                                                                                                     | 2.2             | 1.5E-08 | 2.3E-04           |
| STOM    | ENSG00000148175 | Erythrocyte band 7 integral membrane protein (Stomatin) (Protein 7.2b).                                                                                                            | 2.4             | 1.5E-08 | 9.7E-05           |
| HEXB    | ENSG00000049860 | Beta-hexosaminidase beta chain precursor (EC 3.2.1.52) (N-acetyl-beta-glucosaminidase) (Beta-N-acetylhexosaminidase) (Hexosaminidase B) (Cervical cancer proto-oncogene 7) (HCC-7) | 2.7             | 1.5E-08 | 1.5E-04           |

A tumor tolerogenic microenvironment in THRLBCL

| HGNC ID | Ensembl gene ID | Description                                                                                                                                                                                                                     | fold difference | p-value | corrected p-value |
|---------|-----------------|---------------------------------------------------------------------------------------------------------------------------------------------------------------------------------------------------------------------------------|-----------------|---------|-------------------|
|         | ENSG00000122378 | Protein C10orf58 precursor.                                                                                                                                                                                                     | 2.6             | 1.6E-08 | 3.6E-04           |
| CHMP5   | ENSG00000086065 | Charged multivesicular body protein 5 (Chromatin-modifying protein 5) (Vacuolar protein sorting 60) (Vps60) (hVps60) (SNF7 domain-containing protein 2).                                                                        | 2.0             | 1.6E-08 | 4.2E-04           |
|         | ENSG00000168994 | Uncharacterized protein C6orf145.                                                                                                                                                                                               | 2.5             | 1.6E-08 | 4.1E-04           |
| IFI6    | ENSG00000126709 | Interferon-induced protein 6-16 precursor (Ifi-6-16) (Interferon alpha-inducible protein 6).                                                                                                                                    | 4.7             | 1.7E-08 | 3.0E-04           |
| CASP5   | ENSG00000137757 | Caspase-5 precursor (EC 3.4.22.-) (CASP-5) (ICH-3 protease) (TY protease) (ICE(rel)-III) [Contains: Caspase-5 subunit p20; Caspase-5 subunit p10].                                                                              | 20.0            | 1.7E-08 | 3.2E-05           |
| SIRPA   | ENSG00000198053 | Tyrosine-protein phosphatase non-receptor type substrate 1 precursor (SHP substrate 1) (SHPS-1) (Inhibitory receptor SHPS-1) (Signal- regulatory protein alpha-1) (Sirp-alpha-1) (Sirp-alpha-2) (Sirp-alpha- 3) (MyD-1 antigen) | 5.0             | 1.8E-08 | 3.6E-04           |
| LGALS3  | ENSG00000131981 | Galectin-3 (Galactose-specific lectin 3) (Mac-2 antigen) (IgE-binding protein) (35 kDa lectin) (Carbohydrate-binding protein 35) (CBP 35) (Laminin-binding protein) (Lectin L-29) (L-31) (Galactoside-binding protein) (GALBP). | 3.0             | 1.9E-08 | 9.7E-05           |
| LRP1    | ENSG00000123384 | Low-density lipoprotein receptor-related protein 1 precursor (LRP) (Alpha-2-macroglobulin receptor) (A2MR) (Apolipoprotein E receptor) (APOER) (CD91 antigen).                                                                  | 6.3             | 1.9E-08 | 4.3E-04           |
| C1orf38 | ENSG00000130775 | Induced by contact to basement membrane 1 protein (Protein ICB-1).                                                                                                                                                              | 2.7             | 2.0E-08 | 9.7E-05           |
| MOV10   | ENSG00000155363 | Putative helicase MOV-10 (EC 3.6.1.-) (Moloney leukemia virus 10 protein).                                                                                                                                                      | 1.7             | 2.0E-08 | 4.7E-04           |
| CD38    | ENSG00000004468 | ADP-ribosyl cyclase 1 (EC 3.2.2.5) (Cyclic ADP-ribose hydrolase 1) (cADPr hydrolase 1) (Lymphocyte differentiation antigen CD38) (T10) (Acute lymphoblastic leukemia cells antigen CD38).                                       | 5.4             | 2.0E-08 | 9.7E-05           |
| CARD12  | ENSG00000091106 | Caspase recruitment domain-containing protein 12 (Ice protease- activating factor) (Ipad) (CARD, LRR, and NACHT-containing protein) (Clan protein).                                                                             | 6.0             | 2.0E-08 | 2.8E-04           |

A tumor tolerogenic microenvironment in THRLBCL

| HGNC ID  | Ensembl gene ID | Description                                                                                                                                                                                        | fold difference | p-value | corrected p-value |
|----------|-----------------|----------------------------------------------------------------------------------------------------------------------------------------------------------------------------------------------------|-----------------|---------|-------------------|
| TXN      | ENSG00000136810 | Thioredoxin (ATL-derived factor) (ADF) (Surface-associated sulphhydryl protein) (SASP).                                                                                                            | 3.2             | 2.1E-08 | 2.6E-04           |
| PFKFB4   | ENSG00000114268 | 6-phosphofructo-2-kinase/fructose-2,6-biphosphatase 4 (6PF-2-K/Fru- 2,6-P2ASE testis-type isozyme) [Includes: 6-phosphofructo-2-kinase (EC 2.7.1.105); Fructose-2,6-bisphosphatase (EC 3.1.3.46)]. | 6.0             | 2.1E-08 | 2.2E-05           |
| CD74     | ENSG00000019582 | HLA class II histocompatibility antigen gamma chain (HLA-DR antigens- associated invariant chain) (Ia antigen-associated invariant chain) (Ii) (p33) (CD74 antigen).                               | 2.8             | 2.2E-08 | 5.2E-04           |
| GBP5     | ENSG00000154451 | Interferon-induced guanylate-binding protein 5 (GTP-binding protein 5) (Guanine nucleotide-binding protein 5) (GBP-TA antigen).                                                                    | 4.9             | 2.2E-08 | 1.2E-04           |
| LGALS3BP | ENSG00000108679 | Galectin-3-binding protein precursor (Lectin galactoside-binding soluble 3-binding protein) (Mac-2-binding protein) (Mac-2 BP) (MAC2BP) (Tumor-associated antigen 90K).                            | 3.8             | 2.3E-08 | 1.2E-04           |
| PTAFR    | ENSG00000169403 | Platelet-activating factor receptor (PAF-R).                                                                                                                                                       | 6.2             | 2.3E-08 | 1.2E-04           |
| NAGA     | ENSG00000198951 | Alpha-N-acetylgalactosaminidase precursor (EC 3.2.1.49) (Alpha- galactosidase B).                                                                                                                  | 2.7             | 2.4E-08 | 5.2E-04           |
| GZMH     | ENSG00000100450 | Granzyme H precursor (EC 3.4.21.-) (Cytotoxic T-lymphocyte proteinase) (Cathepsin G-like 2) (CTSG2) (CCP-X) (Cytotoxic serine protease C) (CSP-C).                                                 | 9.1             | 2.4E-08 | 6.1E-04           |
| RNF149   | ENSG00000163162 | ring finger protein 149                                                                                                                                                                            | 1.6             | 2.4E-08 | 9.7E-05           |
| DPYD     | ENSG00000188641 | Dihydropyrimidine dehydrogenase [NADP+] precursor (EC 1.3.1.2) (DPD) (DHPDHase) (Dihydrouracil dehydrogenase) (Dihydrothymine dehydrogenase).                                                      | 2.6             | 2.5E-08 | 4.5E-04           |
| DHRS10   | ENSG00000087076 | Dehydrogenase/reductase SDR family member 10 (EC 1.1.-.-) (Retinal short-chain dehydrogenase/reductase retSDR3).                                                                                   | 2.5             | 2.5E-08 | 5.8E-04           |
| TNFSF10  | ENSG00000121858 | Tumor necrosis factor ligand superfamily member 10 (TNF-related apoptosis-inducing ligand) (TRAIL protein) (Apo-2 ligand) (Apo-2L) (CD253 antigen).                                                | 3.6             | 2.5E-08 | 3.0E-04           |
| PDZD11   | ENSG00000120509 | PDZ domain-containing protein 11.                                                                                                                                                                  | 1.6             | 2.6E-08 | 3.0E-04           |

A tumor tolerogenic microenvironment in THRLBCL

| HGNC ID | Ensembl gene ID | Description                                                                                                                                                                                                                           | fold difference | p-value | corrected p-value |
|---------|-----------------|---------------------------------------------------------------------------------------------------------------------------------------------------------------------------------------------------------------------------------------|-----------------|---------|-------------------|
| GBP1    | ENSG00000117228 | Interferon-induced guanylate-binding protein 1 (GTP-binding protein 1) (Guanine nucleotide-binding protein 1) (HuGBP-1).                                                                                                              | 3.0             | 2.6E-08 | 6.1E-04           |
| PPGB    | ENSG00000064601 | Lysosomal protective protein precursor (EC 3.4.16.5) (Cathepsin A) (Carboxypeptidase C) (Protective protein for beta-galactosidase) [Contains: Lysosomal protective protein 32 kDa chain; Lysosomal protective protein 20 kDa chain]. | 2.2             | 2.6E-08 | 4.5E-04           |
| UBC     | ENSG00000150991 | Ubiquitin.                                                                                                                                                                                                                            | 1.3             | 2.7E-08 | 4.5E-04           |
| CD47    | ENSG00000196776 | Leukocyte surface antigen CD47 precursor (Integrin-associated protein) (IAP) (Antigenic surface determinant protein OA3) (MER6).                                                                                                      | 1.8             | 2.7E-08 | 9.7E-05           |
| FGL2    | ENSG00000127951 | Fibroleukin precursor (Fibrinogen-like protein 2) (pT49).                                                                                                                                                                             | 6.0             | 2.7E-08 | 5.8E-04           |
| RRAGD   | ENSG00000025039 | Ras-related GTP-binding protein D (Rag D).                                                                                                                                                                                            | 3.3             | 2.7E-08 | 6.4E-04           |
| NAGLU   | ENSG00000108784 | Alpha-N-acetylglucosaminidase precursor (EC 3.2.1.50) (N-acetyl-alpha-glucosaminidase) (NAG) [Contains: Alpha-N-acetylglucosaminidase 82 kDa form; Alpha-N-acetylglucosaminidase 77 kDa form].                                        | 2.5             | 2.8E-08 | 6.6E-04           |
| SART2   | ENSG00000111817 | Squamous cell carcinoma antigen recognized by T-cells 2 precursor (SART-2).                                                                                                                                                           | 2.9             | 2.9E-08 | 3.6E-04           |
| AOAH    | ENSG00000136250 | Acyloxyacyl hydrolase precursor (EC 3.1.1.77) [Contains: Acyloxyacyl hydrolase small subunit; Acyloxyacyl hydrolase large subunit].                                                                                                   | 4.5             | 2.9E-08 | 2.1E-04           |
| SLC35F5 | ENSG00000115084 | solute carrier family 35, member F5                                                                                                                                                                                                   | 1.8             | 2.9E-08 | 6.7E-04           |
| PLEKHQ1 | ENSG00000169094 | PH domain-containing protein                                                                                                                                                                                                          | 2.1             | 3.0E-08 | 6.7E-04           |
| CSF1R   | ENSG00000182578 | Macrophage colony-stimulating factor 1 receptor precursor (CSF-1-R) (EC 2.7.10.1) (Fms proto-oncogene) (c-fms) (CD115 antigen).                                                                                                       | 4.2             | 3.0E-08 | 6.4E-04           |
| PLOD1   | ENSG00000083444 | Procollagen-lysine,2-oxoglutarate 5-dioxygenase 1 precursor (EC 1.14.11.4) (Lysyl hydroxylase 1) (LH1).                                                                                                                               | 2.6             | 3.0E-08 | 3.1E-04           |



A tumor tolerogenic microenvironment in THRLBCL

| HGNC ID   | Ensembl gene ID | Description                                                                                                                                                             | fold difference | p-value | corrected p-value |
|-----------|-----------------|-------------------------------------------------------------------------------------------------------------------------------------------------------------------------|-----------------|---------|-------------------|
| CLEC12A   | ENSG00000172322 | myeloid inhibitory C-type lectin-like receptor isoform beta                                                                                                             | 22.7            | 3.1E-08 | 1.3E-04           |
|           | ENSG00000047621 |                                                                                                                                                                         | 1.9             | 3.1E-08 | 4.0E-04           |
| CD300C    | ENSG00000167850 | CMRF35-A antigen precursor (CMRF-35) (CD300c antigen).                                                                                                                  | 5.5             | 3.2E-08 | 6.3E-04           |
| NPC2      | ENSG00000119655 | Epididymal secretory protein E1 precursor (Niemann-Pick disease type C2 protein) (hE1).                                                                                 | 1.9             | 3.3E-08 | 7.4E-04           |
| FZD1      | ENSG00000157240 | Frizzled-1 precursor (Fz-1) (hFz1) (FzE1).                                                                                                                              | 5.0             | 3.3E-08 | 4.7E-04           |
| ATP6V1B2  | ENSG00000147416 | Vacuolar ATP synthase subunit B, brain isoform (EC 3.6.3.14) (V-ATPase B2 subunit) (Vacuolar proton pump B isoform 2) (Endomembrane proton pump 58 kDa subunit) (HO57). | 2.9             | 3.6E-08 | 2.5E-04           |
| CD274     | ENSG00000120217 | Programmed cell death 1 ligand 1 precursor (Programmed death ligand 1) (PD-L1) (PDCD1 ligand 1) (B7 homolog 1) (B7-H1) (CD274 antigen).                                 | 6.6             | 3.7E-08 | 5.2E-04           |
| FCGR1A    | ENSG00000150337 | High affinity immunoglobulin gamma Fc receptor I precursor (Fc-gamma RI) (FcRI) (IgG Fc receptor I) (CD64 antigen).                                                     | 35.3            | 3.8E-08 | 9.7E-05           |
| STARD3NL  | ENSG00000010270 | MLN64 N-terminal domain homolog (STARD3 N-terminal-like protein).                                                                                                       | 1.8             | 3.8E-08 | 4.7E-04           |
| C10orf119 | ENSG00000197771 |                                                                                                                                                                         | 1.5             | 3.8E-08 | 8.0E-04           |
| C15orf24  | ENSG00000134153 | Uncharacterized protein C15orf24 precursor.                                                                                                                             | 1.6             | 3.8E-08 | 7.4E-04           |
| SDHB      | ENSG00000117118 | Succinate dehydrogenase [ubiquinone] iron-sulfur protein, mitochondrial precursor (EC 1.3.5.1) (Ip) (Iron-sulfur subunit of complex II).                                | 2.1             | 3.8E-08 | 2.5E-04           |
| P2RY6     | ENSG00000171631 | P2Y purinoceptor 6 (P2Y6).                                                                                                                                              | 6.6             | 3.9E-08 | 5.4E-05           |
| IDO       | ENSG00000131203 | Indoleamine 2,3-dioxygenase (EC 1.13.11.42) (IDO) (Indoleamine-pyrrole 2,3-dioxygenase).                                                                                | 9.0             | 3.9E-08 | 1.6E-04           |
| RAB7      | ENSG00000075785 | Ras-related protein Rab-7.                                                                                                                                              | 1.7             | 4.0E-08 | 6.8E-04           |

A tumor tolerogenic microenvironment in THRLBCL

| HGNC ID | Ensembl gene ID | Description                                                                                                                                                                                                                         | fold difference | p-value | corrected p-value |
|---------|-----------------|-------------------------------------------------------------------------------------------------------------------------------------------------------------------------------------------------------------------------------------|-----------------|---------|-------------------|
| SAMSN1  | ENSG00000155307 | SAM domain-containing protein SAMSN-1 (SAM domain, SH3 domain and nuclear localisation signals protein 1) (SH3-SAM adaptor protein) (Hematopoietic adaptor containing SH3 and SAM domains 1).                                       | 3.0             | 4.0E-08 | 2.8E-04           |
| AP2S1   | ENSG00000042753 | AP-2 complex subunit sigma-1 (Adapter-related protein complex 2 sigma- 1 subunit) (Clathrin coat assembly protein AP17) (Clathrin coat- associated protein AP17) (Plasma membrane adaptor AP-2 17 kDa protein) (HA2 17 kDa subunit) | 1.6             | 4.2E-08 | 1.1E-04           |
| BATF2   | ENSG00000168062 | basic leucine zipper transcription factor, ATF-like 2                                                                                                                                                                               | 7.0             | 4.3E-08 | 5.7E-04           |
| FUT4    | ENSG00000196371 | Alpha-(1,3)-fucosyltransferase (EC 2.4.1.-) (Galactoside 3-L- fucosyltransferase) (Fucosyltransferase 4) (FUCT-IV) (Fuc-TIV) (ELAM-1 ligand fucosyltransferase).                                                                    | 2.2             | 4.3E-08 | 4.3E-04           |
|         | ENSG00000157107 | FCH domain only 2                                                                                                                                                                                                                   | 3.9             | 4.5E-08 | 4.0E-04           |
| CENPA   | ENSG00000115163 | Centromere protein A (CENP-A) (Centromere autoantigen A).                                                                                                                                                                           | 2.3             | 4.6E-08 | 9.7E-05           |
| KMO     | ENSG00000117009 | Kynurenine 3-monooxygenase (EC 1.14.13.9) (Kynurenine 3-hydroxylase).                                                                                                                                                               | 3.9             | 4.6E-08 | 8.0E-04           |
| PIGT    | ENSG00000124155 | GPI transamidase component PIG-T precursor (Phosphatidylinositol- glycan biosynthesis, class T protein).                                                                                                                            | 1.4             | 4.7E-08 | 4.5E-04           |
| LGALS8  | ENSG00000116977 | Galectin-8 (Gal-8) (Prostate carcinoma tumor antigen 1) (PCTA-1) (Po66 carbohydrate-binding protein) (Po66-CBP).                                                                                                                    | 1.9             | 5.1E-08 | 6.8E-04           |
| CENTA2  | ENSG00000184060 | Centaurin-alpha 2.                                                                                                                                                                                                                  | 5.6             | 5.2E-08 | 8.0E-04           |
|         | ENSG00000180263 | FYVE, RhoGEF and PH domain-containing protein 6 (Zinc finger FYVE domain-containing protein 24).                                                                                                                                    | 3.6             | 5.3E-08 | 9.2E-04           |
| PLXNC1  | ENSG00000136040 | Plexin-C1 precursor (Virus-encoded semaphorin protein receptor).                                                                                                                                                                    | 2.5             | 5.3E-08 | 9.2E-04           |
| HSBP1   | ENSG00000166530 | Heat shock factor binding protein 1 (Nasopharyngeal carcinoma- associated antigen 13) (NPC-A-13).                                                                                                                                   | 1.7             | 5.3E-08 | 4.5E-04           |

A tumor tolerogenic microenvironment in THRLBCL

| HGNC ID  | Ensembl gene ID | Description                                                                                                                                                                                                                                                    | fold difference | p-value | corrected p-value |
|----------|-----------------|----------------------------------------------------------------------------------------------------------------------------------------------------------------------------------------------------------------------------------------------------------------|-----------------|---------|-------------------|
| GRN      | ENSG00000030582 | Granulins precursor (Proepithelin) (PEPI) [Contains: Acrogranin; Paragranulin; Granulin-1 (Granulin G); Granulin-2 (Granulin F); Granulin-3 (Granulin B); Granulin-4 (Granulin A); Granulin-5 (Granulin C); Granulin-6 (Granulin D); Granulin-7 (Granulin E)]. | 3.1             | 5.4E-08 | 5.2E-04           |
| SH3BP2   | ENSG00000087266 | SH3 domain-binding protein 2 (3BP-2).                                                                                                                                                                                                                          | 2.2             | 5.4E-08 | 9.7E-04           |
| FAM105A  | ENSG00000145569 |                                                                                                                                                                                                                                                                | 3.4             | 5.5E-08 | 7.4E-04           |
| TMSB10   | ENSG00000034510 | Thymosin beta-10.                                                                                                                                                                                                                                              | 1.3             | 5.6E-08 | 9.2E-04           |
| MKNK1    | ENSG00000079277 | MAP kinase-interacting serine/threonine-protein kinase 1 (EC 2.7.11.1) (MAP kinase signal-integrating kinase 1) (Mnk1).                                                                                                                                        | 1.9             | 5.6E-08 | 8.7E-04           |
| DERA     | ENSG00000023697 | Putative deoxyribose-phosphate aldolase (EC 4.1.2.4) (Phosphodeoxyriboaldolase) (Deoxyriboaldolase) (DERA).                                                                                                                                                    | 1.4             | 5.9E-08 | 8.6E-04           |
| ARHGAP18 | ENSG00000146376 | Rho GTPase activating protein 18                                                                                                                                                                                                                               | 2.0             | 6.0E-08 | 2.7E-04           |
| CTSD     | ENSG00000117984 | Cathepsin D precursor (EC 3.4.23.5) [Contains: Cathepsin D light chain; Cathepsin D heavy chain].                                                                                                                                                              | 3.4             | 6.4E-08 | 1.0E-03           |
| ABHD5    | ENSG00000011198 | Abhydrolase domain-containing protein 5.                                                                                                                                                                                                                       | 2.3             | 6.5E-08 | 9.5E-04           |
| RAB31    | ENSG00000168461 | Ras-related protein Rab-31 (Rab-22B).                                                                                                                                                                                                                          | 3.1             | 6.6E-08 | 1.0E-03           |
| TMEM144  | ENSG00000164124 |                                                                                                                                                                                                                                                                | 5.8             | 6.8E-08 | 3.2E-05           |
| DBNDD2   | ENSG00000204070 | Dysbindin domain-containing protein 2 (HSMNP1).                                                                                                                                                                                                                | 2.6             | 6.8E-08 | 5.7E-04           |
| TBXAS1   | ENSG00000059377 | Thromboxane-A synthase (EC 5.3.99.5) (TXA synthase) (TXS) (Cytochrome P450 5A1).                                                                                                                                                                               | 4.5             | 6.8E-08 | 1.6E-04           |
|          | ENSG00000119321 | Peptidyl-prolyl cis-trans isomerase (EC 5.2.1.8) (Fragment).                                                                                                                                                                                                   | 2.6             | 6.8E-08 | 9.7E-05           |
| OSTM1    | ENSG00000081087 | Osteopetrosis-associated transmembrane protein 1 precursor.                                                                                                                                                                                                    | 2.2             | 6.9E-08 | 9.7E-05           |

A tumor tolerogenic microenvironment in THRLBCL

| HGNC ID  | Ensembl gene ID | Description                                                                                                                                                                                                                                                     | fold difference | p-value | corrected p-value |
|----------|-----------------|-----------------------------------------------------------------------------------------------------------------------------------------------------------------------------------------------------------------------------------------------------------------|-----------------|---------|-------------------|
| TSHZ3    | ENSG00000121297 | Teashirt homolog 3 (Zinc finger protein 537).                                                                                                                                                                                                                   | 9.1             | 7.0E-08 | 2.5E-04           |
| PDCD1LG2 | ENSG00000197646 | Programmed cell death 1 ligand 2 precursor (Programmed death ligand 2) (PD-L2) (PD-1-ligand 2) (PDCD1 ligand 2) (Butyrophilin B7-DC) (B7-DC) (CD273 antigen).                                                                                                   | 11.8            | 7.1E-08 | 1.2E-04           |
| SFXN3    | ENSG00000107819 | Sideroflexin-3.                                                                                                                                                                                                                                                 | 2.4             | 7.1E-08 | 3.8E-04           |
| TK2      | ENSG00000166548 | Thymidine kinase 2, mitochondrial precursor (EC 2.7.1.21) (Mt-TK).                                                                                                                                                                                              | 1.8             | 7.4E-08 | 2.3E-04           |
| CCRL2    | ENSG00000121797 | C-C chemokine receptor-like 2 (Putative MCP-1 chemokine receptor) (Chemokine receptor CCR11) (Chemokine receptor X).                                                                                                                                            | 11.9            | 7.4E-08 | 7.4E-04           |
| LOXL3    | ENSG00000115318 | Lysyl oxidase homolog 3 precursor (EC 1.4.3.-) (Lysyl oxidase-like protein 3).                                                                                                                                                                                  | 2.2             | 7.6E-08 | 8.9E-04           |
| RHOU     | ENSG00000116574 | ras homolog gene family, member U                                                                                                                                                                                                                               | 7.2             | 7.6E-08 | 3.0E-04           |
| PLAUR    | ENSG00000011422 | Urokinase plasminogen activator surface receptor precursor (uPAR) (U- PAR) (Monocyte activation antigen Mo3) (CD87 antigen).                                                                                                                                    | 10.0            | 7.8E-08 | 2.6E-04           |
|          | ENSG00000122694 | Golgi-associated plant pathogenesis-related protein 1 (Golgi- associated PR-1 protein) (GAPR-1) (Glioma pathogenesis-related protein 2) (GliPR 2).                                                                                                              | 2.4             | 7.9E-08 | 6.8E-04           |
| SEPX1    | ENSG00000198736 | Methionine-R-sulfoxide reductase (EC 1.8.4.-) (Selenoprotein X 1).                                                                                                                                                                                              | 2.3             | 9.0E-08 | 3.6E-04           |
| ACSL1    | ENSG00000151726 | Long-chain-fatty-acid--CoA ligase 1 (EC 6.2.1.3) (Long-chain acyl-CoA synthetase 1) (LACS 1) (Palmitoyl-CoA ligase 1) (Long-chain fatty acid CoA ligase 2) (Long-chain acyl-CoA synthetase 2) (LACS 2) (Acyl-CoA synthetase 1) (ACS1) (Palmitoyl-CoA ligase 2). | 7.5             | 9.2E-08 | 9.7E-05           |
| KCNMA1   | ENSG00000156113 | Calcium-activated potassium channel subunit alpha 1 (Calcium-activated potassium channel, subfamily M subunit alpha 1) (Maxi K channel) (MaxiK) (BK channel) (K(VCA)alpha) (BKCA alpha) (KCa1.1) (Slowpoke homolog) (Slo homolog) (Slo-alpha) (Slo1) (hSlo).    | 3.6             | 9.6E-08 | 1.5E-04           |
| GCH1     | ENSG00000131979 | GTP cyclohydrolase I (EC 3.5.4.16) (GTP-CH-I).                                                                                                                                                                                                                  | 4.8             | 9.7E-08 | 8.7E-05           |

A tumor tolerogenic microenvironment in THRLBCL

| HGNC ID | Ensembl gene ID | Description                                                                                                                                                                                                                                                                               | fold difference | p-value | corrected p-value |
|---------|-----------------|-------------------------------------------------------------------------------------------------------------------------------------------------------------------------------------------------------------------------------------------------------------------------------------------|-----------------|---------|-------------------|
|         | ENSG00000023318 | Thioredoxin domain-containing protein 4 precursor (Endoplasmic reticulum resident protein ERp44).                                                                                                                                                                                         | 1.6             | 9.8E-08 | 9.2E-04           |
| ATP6AP2 | ENSG00000182220 | Renin receptor precursor (Renin/prorenin receptor) (ATPase, H <sup>+</sup> - transporting, lysosomal accessory protein 2) (ATPase, H <sup>+</sup> -transporting, lysosomal-interacting protein 2) (Vacuolar ATP synthase membrane sector-associated protein M8-9) (V-ATPase M8.9 subunit) | 1.4             | 1.0E-07 | 7.8E-04           |
| HAVCR2  | ENSG00000135077 | Hepatitis A virus cellular receptor 2 precursor (HAVcr-2) (T cell immunoglobulin and mucin domain-containing protein 3) (TIMD-3) (T cell membrane protein 3) (TIM-3).                                                                                                                     | 3.9             | 1.0E-07 | 9.7E-05           |
| SFN     | ENSG00000175793 | 14-3-3 protein sigma (Stratifin) (Epithelial cell marker protein 1).                                                                                                                                                                                                                      | 2.2             | 1.1E-07 | 9.2E-04           |
| MNDA    | ENSG00000163563 | Myeloid cell nuclear differentiation antigen.                                                                                                                                                                                                                                             | 3.8             | 1.1E-07 | 3.1E-04           |
| CTBS    | ENSG00000117151 | Di-N-acetylchitobiase precursor (EC 3.2.1.-).                                                                                                                                                                                                                                             | 1.5             | 1.1E-07 | 8.0E-04           |
| SLC39A8 | ENSG00000138821 | solute carrier family 39 (zinc transporter), member 8                                                                                                                                                                                                                                     | 23.3            | 1.1E-07 | 9.7E-05           |
| PLEKHB2 | ENSG00000115762 | Pleckstrin homology domain-containing family B member 2 (Evectin-2).                                                                                                                                                                                                                      | 1.8             | 1.2E-07 | 6.8E-04           |
| YIPF1   | ENSG00000058799 | Protein YIPF1 (YIP1 family member 1).                                                                                                                                                                                                                                                     | 1.6             | 1.3E-07 | 9.2E-04           |
| ATP6V0B | ENSG00000117410 | Vacuolar ATP synthase 21 kDa proteolipid subunit (EC 3.6.3.14) (HATPL).                                                                                                                                                                                                                   | 2.1             | 1.3E-07 | 2.5E-04           |
| ME1     | ENSG00000065833 | NADP-dependent malic enzyme (EC 1.1.1.40) (NADP-ME) (Malic enzyme 1).                                                                                                                                                                                                                     | 11.7            | 1.3E-07 | 9.7E-04           |
|         | ENSG00000138600 | Signal peptide peptidase-like 2A (EC 3.4.23.-) (Protein SPP-like 2A) (Protein SPPL2a) (Intramembrane protease 3) (IMP3) (Presenilin-like protein 2).                                                                                                                                      | 2.6             | 1.4E-07 | 9.7E-05           |
| PDE4DIP | ENSG00000178104 | phosphodiesterase 4D interacting protein isoform 3                                                                                                                                                                                                                                        | 32.0            | 1.4E-07 | 3.2E-05           |
| SLC43A3 | ENSG00000134802 | solute carrier family 43, member 3                                                                                                                                                                                                                                                        | 2.7             | 1.4E-07 | 2.8E-04           |
|         | ENSG00000153113 | Calpastatin (Calpain inhibitor) (Sperm BS-17 component).                                                                                                                                                                                                                                  | 1.6             | 1.4E-07 | 1.2E-04           |

A tumor tolerogenic microenvironment in THRLBCL

| HGNC ID  | Ensembl gene ID | Description                                                                                                                                                                                                                                                | fold difference | p-value | corrected p-value |
|----------|-----------------|------------------------------------------------------------------------------------------------------------------------------------------------------------------------------------------------------------------------------------------------------------|-----------------|---------|-------------------|
| CTSL     | ENSG00000135047 | Cathepsin L precursor (EC 3.4.22.15) (Major excreted protein) (MEP) [Contains: Cathepsin L heavy chain; Cathepsin L light chain].                                                                                                                          | 5.1             | 1.4E-07 | 9.2E-04           |
| IBRDC3   | ENSG00000116514 | IBR domain-containing protein 3.                                                                                                                                                                                                                           | 3.4             | 1.5E-07 | 9.6E-04           |
| GRIN3A   | ENSG00000198785 | Glutamate [NMDA] receptor subunit 3A precursor (N-methyl-D-aspartate receptor subtype NR3A) (NMDAR-L).                                                                                                                                                     | 13.9            | 1.6E-07 | 9.7E-05           |
| ATP6V0C  | ENSG00000185883 | Vacuolar ATP synthase 16 kDa proteolipid subunit (EC 3.6.3.14).                                                                                                                                                                                            | 2.2             | 1.6E-07 | 9.7E-05           |
| SPFH1    | ENSG00000107566 | SPFH domain-containing protein 1 precursor (Protein KE04).                                                                                                                                                                                                 | 2.1             | 1.6E-07 | 9.7E-05           |
| NCF2     | ENSG00000116701 | Neutrophil cytosol factor 2 (NCF-2) (Neutrophil NADPH oxidase factor 2) (67 kDa neutrophil oxidase factor) (p67-phox) (NOXA2).                                                                                                                             | 11.4            | 1.7E-07 | 1.4E-04           |
| EMILIN2  | ENSG00000132205 | EMILIN-2 precursor (Elastin microfibril interface-located protein 2) (Elastin microfibril interfacier 2) (Protein FOAP-10).                                                                                                                                | 6.7             | 1.7E-07 | 8.0E-04           |
| RASSF4   | ENSG00000107551 | Ras association domain-containing protein 4.                                                                                                                                                                                                               | 3.7             | 1.8E-07 | 9.1E-04           |
| ATP6V0A1 | ENSG00000033627 | Vacuolar proton translocating ATPase 116 kDa subunit a isoform 1 (V- ATPase 116-kDa isoform a1) (Clathrin-coated vesicle/synaptic vesicle proton pump 116 kDa subunit) (Vacuolar proton pump subunit 1) (Vacuolar adenosine triphosphatase subunit Ac116). | 7.1             | 1.8E-07 | 6.8E-04           |
|          | ENSG00000178420 |                                                                                                                                                                                                                                                            | 6.7             | 1.8E-07 | 5.8E-04           |
| RAP2B    | ENSG00000181467 | Ras-related protein Rap-2b precursor.                                                                                                                                                                                                                      | 2.7             | 1.9E-07 | 5.8E-04           |
| PLOD3    | ENSG00000106397 | Procollagen-lysine,2-oxoglutarate 5-dioxygenase 3 precursor (EC 1.14.11.4) (Lysyl hydroxylase 3) (LH3).                                                                                                                                                    | 2.3             | 1.9E-07 | 7.6E-04           |
|          | ENSG00000105518 |                                                                                                                                                                                                                                                            | 1.8             | 2.0E-07 | 8.6E-04           |
| ACBD5    | ENSG00000107897 | acyl-Coenzyme A binding domain containing 5                                                                                                                                                                                                                | 1.7             | 2.2E-07 | 9.1E-04           |

A tumor tolerogenic microenvironment in THRLBCL

| HGNC ID  | Ensembl gene ID | Description                                                                                                                                                                | fold difference | p-value | corrected p-value |
|----------|-----------------|----------------------------------------------------------------------------------------------------------------------------------------------------------------------------|-----------------|---------|-------------------|
| MCTP1    | ENSG00000175471 | multiple C2-domains with two transmembrane regions 1 isoform L                                                                                                             | 6.9             | 2.3E-07 | 1.4E-04           |
| PDXK     | ENSG00000160209 |                                                                                                                                                                            | 3.2             | 2.4E-07 | 3.1E-04           |
| TMEM86A  | ENSG00000151117 | Transmembrane protein 86A.                                                                                                                                                 | 5.7             | 2.4E-07 | 9.2E-04           |
| RALB     | ENSG00000144118 | Ras-related protein Ral-B.                                                                                                                                                 | 2.4             | 2.4E-07 | 9.7E-05           |
| APOBEC3A | ENSG00000128383 | Probable DNA dC->dU-editing enzyme APOBEC-3A (EC 3.5.4.-) (Phorbolin- 1).                                                                                                  | 27.0            | 2.6E-07 | 9.7E-05           |
| CBARA1   | ENSG00000107745 | calcium binding atopy-related autoantigen 1                                                                                                                                | 1.9             | 2.7E-07 | 4.3E-04           |
| SPG21    | ENSG00000090487 | Masparidin (Spastic paraplegia 21 autosomal recessive Mast syndrome protein) (Acid cluster protein 33).                                                                    | 1.6             | 2.7E-07 | 9.7E-05           |
| ATP6V0E  | ENSG00000113732 | Vacuolar ATP synthase subunit H (EC 3.6.3.14) (V-ATPase H subunit) (Vacuolar proton pump H subunit) (V-ATPase M9.2 subunit) (V-ATPase 9.2 kDa membrane accessory protein). | 1.4             | 2.8E-07 | 9.2E-04           |
| MSR1     | ENSG00000038945 | Macrophage scavenger receptor types I and II (Macrophage acetylated LDL receptor I and II) (Scavenger receptor class A member 1) (CD204 antigen).                          | 38.3            | 2.9E-07 | 5.4E-05           |
| C17orf58 | ENSG00000186665 |                                                                                                                                                                            | 1.9             | 3.2E-07 | 7.1E-04           |
|          | ENSG00000162840 | metallothionein 1H-like protein                                                                                                                                            | 16.2            | 3.3E-07 | 9.7E-05           |
| MT1G     | ENSG00000125144 | Metallothionein-1G (MT-1G) (Metallothionein-IG) (MT-IG) (Metallothionein-1K) (MT-1K).                                                                                      | 43.4            | 3.6E-07 | 9.7E-05           |
| SQRDL    | ENSG00000137767 | Sulfide:quinone oxidoreductase, mitochondrial precursor (EC 1.-.-.-).                                                                                                      | 2.6             | 3.7E-07 | 8.7E-04           |
| TP53INP2 | ENSG00000078804 | Tumor protein p53-inducible nuclear protein 2 (p53-inducible protein U) (PIG-U).                                                                                           | 2.1             | 3.7E-07 | 8.0E-04           |
| UBE2D4   | ENSG00000078967 | ubiquitin-conjugating enzyme E2D 4 (putative)                                                                                                                              | 1.9             | 3.8E-07 | 8.2E-04           |

A tumor tolerogenic microenvironment in THRLBCL

| HGNC ID | Ensembl gene ID | Description                                                                                                                                                                                      | fold difference | p-value | corrected p-value |
|---------|-----------------|--------------------------------------------------------------------------------------------------------------------------------------------------------------------------------------------------|-----------------|---------|-------------------|
| NFE2L2  | ENSG00000116044 | Nuclear factor erythroid 2-related factor 2 (NF-E2-related factor 2) (NFE2-related factor 2) (Nuclear factor, erythroid derived 2, like 2) (HEBP1).                                              | 1.8             | 3.9E-07 | 8.3E-04           |
| M6PRBP1 | ENSG00000105355 | Mannose-6-phosphate receptor-binding protein 1 (Cargo selection protein TIP47) (47 kDa mannose 6-phosphate receptor-binding protein) (47 kDa MPR-binding protein) (Placental protein 17) (PP17). | 1.9             | 4.0E-07 | 9.1E-04           |
| LIMK2   | ENSG00000182541 | LIM domain kinase 2 (EC 2.7.11.1) (LIMK-2).                                                                                                                                                      | 4.3             | 4.0E-07 | 9.7E-05           |
|         | ENSG00000196814 |                                                                                                                                                                                                  | 2.7             | 4.3E-07 | 9.7E-05           |
| SLAMF8  | ENSG00000158714 | SLAM family member 8 precursor (B-lymphocyte activator macrophage expressed) (BCM-like membrane protein).                                                                                        | 6.2             | 4.8E-07 | 6.5E-04           |
| ERO1L   | ENSG00000197930 | ERO1-like protein alpha precursor (EC 1.8.4.-) (ERO1-Lalpha) (Oxidoreductin-1-Lalpha) (Endoplasmic oxidoreductin-1-like protein) (ERO1-L).                                                       | 2.4             | 4.8E-07 | 5.8E-04           |
| GPR84   | ENSG00000139572 | Probable G-protein coupled receptor 84 (Inflammation-related G-protein coupled receptor EX33).                                                                                                   | 41.8            | 5.0E-07 | 9.7E-05           |
| MT1M    | ENSG00000205364 | Metallothionein-1M (MT-1M) (Metallothionein-IM) (MT-IM).                                                                                                                                         | 247.2           | 5.1E-07 | 3.2E-05           |
| NBN     | ENSG00000104320 | Nibrin (Nijmegen breakage syndrome protein 1) (Cell cycle regulatory protein p95).                                                                                                               | 1.7             | 5.6E-07 | 7.4E-04           |
| DECR1   | ENSG00000104325 | 2,4-dienoyl-CoA reductase, mitochondrial precursor (EC 1.3.1.34) (2,4- dienoyl-CoA reductase [NADPH]) (4-enoyl-CoA reductase [NADPH]).                                                           | 1.4             | 5.8E-07 | 9.7E-04           |
| PGD     | ENSG00000142657 | 6-phosphogluconate dehydrogenase, decarboxylating (EC 1.1.1.44).                                                                                                                                 | 3.7             | 5.9E-07 | 1.7E-04           |
| RNF135  | ENSG00000181481 | ring finger protein 135 isoform 2                                                                                                                                                                | 1.9             | 6.2E-07 | 8.7E-04           |
|         | ENSG00000008382 |                                                                                                                                                                                                  | 2.7             | 6.9E-07 | 2.9E-04           |
| VAT1    | ENSG00000108828 | Synaptic vesicle membrane protein VAT-1 homolog (EC 1.-.-.-).                                                                                                                                    | 2.9             | 7.2E-07 | 3.6E-04           |



A tumor tolerogenic microenvironment in THRLBCL

| HGNC ID | Ensembl gene ID | Description                                                                                                                                                                                                        | fold difference | p-value | corrected p-value |
|---------|-----------------|--------------------------------------------------------------------------------------------------------------------------------------------------------------------------------------------------------------------|-----------------|---------|-------------------|
| SORT1   | ENSG00000134243 | Sortilin precursor (Neurotensin receptor 3) (NTR3) (NT3) (Glycoprotein 95) (Gp95) (100 kDa NT receptor).                                                                                                           | 7.5             | 7.5E-07 | 6.4E-04           |
| TMEM51  | ENSG00000171729 | Transmembrane protein 51.                                                                                                                                                                                          | 3.2             | 8.1E-07 | 1.5E-04           |
| REEP4   | ENSG00000168476 | Receptor expression-enhancing protein 4.                                                                                                                                                                           | 2.6             | 8.2E-07 | 6.4E-04           |
| BLVRB   | ENSG00000090013 | Flavin reductase (EC 1.5.1.30) (FR) (NADPH-dependent diaphorase) (NADPH-flavin reductase) (FLR) (Biliverdin reductase B) (EC 1.3.1.24) (BVR-B) (Biliverdin-IX beta-reductase) (Green heme-binding protein) (GHBP). | 5.1             | 8.5E-07 | 6.4E-04           |
| IFI35   | ENSG00000068079 | Interferon-induced 35 kDa protein (IFP 35).                                                                                                                                                                        | 2.4             | 1.1E-06 | 8.0E-04           |
| MT1X    | ENSG00000187193 | Metallothionein-1X (MT-1X) (Metallothionein-IX) (MT-IX).                                                                                                                                                           | 20.6            | 1.1E-06 | 1.6E-04           |
| MT1F    | ENSG00000198417 | Metallothionein-1F (MT-1F) (Metallothionein-IF) (MT-IF).                                                                                                                                                           | 17.9            | 1.5E-06 | 1.7E-04           |
| PLEKHG3 | ENSG00000126822 | pleckstrin homology domain containing, family G, member 3                                                                                                                                                          | 4.6             | 2.2E-06 | 8.0E-04           |
| RAB39   | ENSG00000179331 | Ras-related protein Rab-39A (Rab-39).                                                                                                                                                                              | 3.5             | 2.3E-06 | 1.3E-04           |
|         | ENSG00000109756 | Rap guanine nucleotide exchange factor 2 (Neural RAP guanine nucleotide exchange protein) (nRap GEP) (PDZ domain-containing guanine nucleotide exchange factor 1) (PDZ-GEF1) (RA-GEF).                             | 2.8             | 3.6E-06 | 9.1E-04           |
| METTL7B | ENSG00000170439 |                                                                                                                                                                                                                    | 27.0            | 5.8E-06 | 5.8E-04           |

**Supplementary Table 2. Results of real-time quantitative RT-PCR validation of the microarray gene expression data.**

We performed real-time quantitative RT-PCR on 10 genes to validate the microarray gene expression data. Fold differences in gene expression for THRLBCL compared to NLPHL are shown, as measured by (i) microarray and (ii) quantitative RT-PCR, for 10 genes, selected for their involvement in interferon pathways, macrophage activation and innate immune responses. Expression values are averages of 10 NLPHL and 10 THRLBCL samples. The same cases were used for microarray and quantitative RT-PCR expression profiling. With the exception of the gene CD74 (differentially expressed according to the microarray data but showing no significant expression difference by real-time quantitative RT-PCR), the obtained expression fold differences for these genes correspond well to the microarray data.

| Gene symbol      | Description                                         | Fold difference microarray | Fold difference quantitative RT-PCR (p-value <sup>1</sup> ) |
|------------------|-----------------------------------------------------|----------------------------|-------------------------------------------------------------|
| IFN- $\gamma$    | Interferon gamma                                    | 4.7 <sup>2</sup>           | 4.4 (p = 1.0 x 10 <sup>-5</sup> )                           |
| STAT-1           | Signal transducer and activator of transcription 1  | 1.6                        | 2.9 (p = 4.4 x 10 <sup>-9</sup> )                           |
| CD74             | HLA class II histocompatibility antigen gamma chain | 2.8                        | 1.2 (p = 0.21)                                              |
| CCL8 (MCP-2)     | Monocyte chemotactic protein 2                      | 143.5                      | 84.8 (p = 3.9 x 10 <sup>-9</sup> )                          |
| IDO              | Indoleamine 2,3-dioxygenase                         | 9.0                        | 12.3 (p = 1.6 x 10 <sup>-8</sup> )                          |
| IFN- $\alpha$ 1  | Interferon alpha 1                                  | 1.0 <sup>2</sup>           | 0.92 (p = 0.81)                                             |
| IFN- $\alpha$ R2 | Interferon alpha receptor 2                         | 0.9 <sup>2</sup>           | 1.3 (p = 5.3 x 10 <sup>-3</sup> )                           |
| STAT-2           | Signal transducer and activator of transcription 2  | 1.8 <sup>2</sup>           | 1.3 (p = 0.11)                                              |
| TLR8             | Toll-like receptor 8                                | 11.5                       | 11.5 (p = 6.4 x 10 <sup>-11</sup> )                         |
| MyD88            | Myeloid differentiation factor 88                   | 1.8 <sup>2</sup>           | 2.2 (p = 6.7 x 10 <sup>-7</sup> )                           |

<sup>1</sup> T-test, not corrected for multiple testing.

<sup>2</sup> Difference was not significant at p < 0.001 (after correction for multiple testing).

**Supplementary Table 3. Results of quantitative RT-PCR measurements of additional THRLBCL and NLPHL samples based on core elements of the gene expression signatures.**

Expression values of the three selected genes against each of the two calibrator samples are given, as measured by quantitative RT-PCR.

**A. Lymphoma samples from the University Hospitals K.U.Leuven**

| diagnosis by morphology | FCER1G |         | VSIG4  |         | FCRL1  |         |
|-------------------------|--------|---------|--------|---------|--------|---------|
|                         | NLPHL  | THRLBCL | NLPHL  | THRLBCL | NLPHL  | THRLBCL |
| control NLPHL           | 1.00   | 0.093   | 1.00   | 0.0016  | 1.00   | 357     |
| control THRLBCL         | 11     | 1.00    | 607    | 1.00    | 0.0028 | 1.00    |
| NLPHL                   | 1.63   | 0.099   | 0.0072 | 1.7E-05 | 4.15   | 6317    |
| NLPHL                   | 5.31   | 0.52    | 4.00   | 0.0071  | 0.33   | 22      |
| NLPHL                   | 1.52   | 0.17    | 13     | 0.027   | 1.75   | 10922   |
| NLPHL                   | 1.82   | 0.14    | 2.64   | 0.0048  | 2.49   | 129     |
| NLPHL                   | 1.61   | 0.14    | 11     | 0.018   | 6.57   | 699     |
| NLPHL                   | 0.92   | 0.073   | 0.010  | 0.00077 | 1.45   | 69      |
| NLPHL                   | 1.27   | 0.046   | 0.012  | 0.00050 | 2.27   | 1624    |
| NLPHL                   | 2.24   | 0.28    | 2.07   | 0.0036  | 2.65   | 21346   |
| NLPHL                   | 1.17   | 0.095   | 0.010  | 1.9E-05 | 5.27   | 17682   |
| NLPHL                   | 1.19   | 0.15    | 0.32   | 0.00071 | 2.25   | 7074    |
| NLPHL                   | 1.85   | 0.18    | 4.11   | 0.0063  | 0.47   | 30      |
| NLPHL                   | 0.93   | 0.034   | 0.0081 | 0.00015 | 1.35   | 2095    |
| NLPHL                   | 0.80   | 0.063   | 2.74   | 0.0040  | 2.65   | 105     |
| NLPHL                   | 1.43   | 0.14    | 1.37   | 0.0025  | 1.22   | 3857    |
| NLPHL                   | 1.47   | 0.14    | 0.013  | 2.7E-05 | 1.79   | 2086    |
| NLPHL                   | 4.13   | 0.18    | 2.52   | 0.0054  | 1.39   | 3140    |
| NLPHL                   | 1.13   | 0.10    | 1.28   | 0.0024  | 0.82   | 77      |
| NLPHL                   | 2.20   | 0.21    | 0.42   | 0.00096 | 0.41   | 51      |
| NLPHL                   | 2.65   | 0.25    | 0.50   | 0.00095 | 3.43   | 239     |
| NLPHL                   | 1.64   | 0.12    | 0.015  | 4.0E-05 | 16     | 978     |
| NLPHL                   | 3.05   | 0.25    | 1.11   | 0.0021  | 0.94   | 1100    |
| NLPHL                   | 0.80   | 0.073   | 1.55   | 0.0028  | 10     | 364     |
| NLPHL                   | 2.77   | 0.22    | 1.85   | 0.0038  | 6.04   | 207     |
| NLPHL                   | 3.10   | 0.28    | 10     | 0.016   | 1.37   | 108     |
| NLPHL                   | 0.56   | 0.043   | 0.010  | 1.6E-05 | 1.96   | 160     |

A tumor tolerogenic microenvironment in THRLBCL

| diagnosis by morphology | FCER1G |         | VSIG4 |         | FCRL1   |         |
|-------------------------|--------|---------|-------|---------|---------|---------|
|                         | NLPHL  | THRLBCL | NLPHL | THRLBCL | NLPHL   | THRLBCL |
| NLPHL                   | 2.26   | 0.20    | 2.90  | 0.0050  | 2.17    | 324     |
| NLPHL                   | 2.39   | 0.25    | 7.86  | 0.016   | 2.25    | 139     |
| NLPHL                   | 2.38   | 0.23    | 62    | 0.069   | 1.09    | 133     |
| NLPHL                   | 0.63   | 0.061   | 0.33  | 0.00078 | 0.27    | 600     |
| NLPHL                   | 1.60   | 0.15    | 0.015 | 0.00075 | 4.26    | 212     |
| NLPHL                   | 1.65   | 0.14    | 0.013 | 2.0E-05 | 0.86    | 77      |
| NLPHL                   | 5.33   | 0.014   | 7.93  | 0.046   | 1.29    | 2571    |
| NLPHL                   | 2.81   | 0.24    | 3.58  | 0.0054  | 2.21    | 117     |
| NLPHL                   | 1.06   | 0.096   | 0.73  | 0.0012  | 1.40    | 61      |
| NLPHL                   | 1.92   | 0.28    | 1.39  | 0.0013  | 0.28    | 496     |
| NLPHL                   | 1.66   | 0.15    | 2.88  | 0.0047  | 1.59    | 5107    |
| NLPHL                   | 0.93   | 0.084   | 2.18  | 0.0035  | 0.69    | 70      |
| THRLBCL                 | 7.56   | 0.70    | 19    | 0.030   | 0.00035 | 0.020   |
| THRLBCL                 | 10     | 0.88    | 436   | 0.64    | 0.19    | 14      |
| THRLBCL                 | 21     | 1.77    | 1208  | 1.38    | 0.23    | 7.96    |
| THRLBCL                 | 6.66   | 0.60    | 278   | 0.45    | 0.11    | 2.86    |
| THRLBCL                 | 25     | 2.46    | 267   | 0.38    | 0.58    | 16      |
| THRLBCL                 | 8.11   | 0.73    | 373   | 0.58    | 0.052   | 5.21    |
| THRLBCL                 | 36     | 2.81    | 3595  | 3.85    | 0.00045 | 0.030   |
| THRLBCL                 | 12     | 1.12    | 514   | 0.75    | 0.12    | 407     |
| THRLBCL                 | 16     | 1.20    | 317   | 0.31    | 0.69    | 28      |
| THRLBCL                 | 6.39   | 0.53    | 526   | 0.90    | 0.028   | 83      |
| THRLBCL                 | 13     | 0.99    | 44    | 0.045   | 0.033   | 1.48    |
| THRLBCL                 | 17     | 1.55    | 1356  | 2.25    | 0.083   | 7.61    |
| THRLBCL                 | 12     | 0.92    | 713   | 0.80    | 0.00088 | 1.93    |
| THRLBCL                 | 8.48   | 1.04    | 698   | 0.74    | 0.0018  | 3.71    |
| THRLBCL                 | 5.62   | 0.56    | 152   | 0.26    | 0.13    | 13      |
| THRLBCL                 | 24     | 2.03    | 1457  | 1.98    | 0.023   | 0.011   |
| THRLBCL                 | 25     | 2.20    | 3692  | 5.63    | 0.034   | 3.26    |
| THRLBCL                 | 5.92   | 0.50    | 21    | 0.034   | 0.16    | 7.11    |

**B. Lymphoma samples from the Rikshospitalet-Radiumhospitalet HF Oslo**

| diagnosis by<br>morphology | FCER1G |         | VSIG4 |         | FCRL1  |         |
|----------------------------|--------|---------|-------|---------|--------|---------|
|                            | NLPHL  | THRLBCL | NLPHL | THRLBCL | NLPHL  | THRLBCL |
| control NLPHL              | 1.00   | 0.23    | 1.00  | 0.19    | 1.00   | 36      |
| control THRLBCL            | 4.29   | 1.00    | 5.25  | 1.00    | 0.028  | 1.00    |
| NLPHL                      | 13     | 2.97    | 0.27  | 0.052   | 0.24   | 8.41    |
| NLPHL                      | 0.66   | 0.15    | 0.098 | 0.019   | 0.041  | 1.45    |
| NLPHL                      | 2.89   | 0.67    | 0.81  | 0.15    | 1.54   | 55      |
| NLPHL                      | 5.55   | 1.30    | 0.29  | 0.054   | 0.27   | 9.62    |
| NLPHL                      | 8.61   | 2.01    | 0.26  | 0.050   | 0.24   | 8.36    |
| NLPHL                      | 2.89   | 0.67    | 0.65  | 0.12    | 1.86   | 66      |
| NLPHL                      | 11     | 2.50    | 1.82  | 0.35    | 2.58   | 92      |
| NLPHL                      | 1.44   | 0.34    | 0.11  | 0.021   | 0.18   | 6.37    |
| NLPHL                      | 5.10   | 1.19    | 0.40  | 0.077   | 0.62   | 22      |
| THRLBCL                    | 85     | 20      | 4.99  | 0.95    | 7.55   | 268     |
| THRLBCL                    | 77     | 18      | 256   | 49      | 0.0031 | 0.11    |
| THRLBCL                    | 7.05   | 1.64    | 1.37  | 0.26    | 0.0052 | 0.18    |
| THRLBCL                    | 27     | 6.40    | 149   | 28      | 0.0053 | 0.19    |
| THRLBCL                    | 149    | 35      | 198   | 38      | 0.014  | 0.48    |

**Supplementary Table 4. Overlap of the NLPHL and THRLBCL gene expression signatures with signatures obtained in other studies.**

**A. Overlap of the NLPHL gene expression signature with the Monti *et al.* (1) B cell receptor/proliferation signature.**

| HGNC ID | Ensembl gene ID | description                                                                                                                                                                                                            | fold difference | p-value | corrected p-value |
|---------|-----------------|------------------------------------------------------------------------------------------------------------------------------------------------------------------------------------------------------------------------|-----------------|---------|-------------------|
| CD22    | ENSG00000012124 | B-cell receptor CD22 precursor (Leu-14) (B-lymphocyte cell adhesion molecule) (BL-CAM) (Siglec-2).                                                                                                                     | 15.0            | 2.4E-09 | 3.2E-05           |
| CD37    | ENSG00000104894 | Leukocyte antigen CD37 (Tetraspanin-26) (Tspan-26).                                                                                                                                                                    | 3.2             | 1.0E-09 | 5.4E-05           |
| CD79A   | ENSG00000105369 | B-cell antigen receptor complex-associated protein alpha-chain precursor (Ig-alpha) (MB-1 membrane glycoprotein) (Surface IgM- associated protein) (Membrane-bound immunoglobulin-associated protein) (CD79a antigen). | 12.4            | 2.2E-09 | 3.2E-05           |
| BCL11A  | ENSG00000119866 | B-cell lymphoma/leukemia 11A (B-cell CLL/lymphoma 11A) (COUP-TF-interacting protein 1) (Ecotropic viral integration site 9 protein) (EVI-9).                                                                           | 12.0            | 1.1E-11 | 1.1E-05           |
| FOXO1A  | ENSG00000150907 | Forkhead box protein O1A (Forkhead in rhabdomyosarcoma).                                                                                                                                                               | 2.5             | 4.3E-08 | 1.4E-04           |
| CD19    | ENSG00000177455 | B-lymphocyte antigen CD19 precursor (B-lymphocyte surface antigen B4) (Leu-12) (Differentiation antigen CD19).                                                                                                         | 18.1            | 4.1E-08 | 9.7E-05           |
| PAX5    | ENSG00000196092 | Paired box protein Pax-5 (B-cell-specific transcription factor) (BSAP).                                                                                                                                                | 8.3             | 4.9E-12 | 2.2E-05           |

A tumor tolerogenic microenvironment in THRLBCL

**B. Overlap of the NPLHL gene expression signature with the Brune *et al.* (2) signature comparing microdissected NPLHL tumor cells to microdissected THRLBCL tumor cells.**

| HGNC ID | Ensembl gene ID | description                                    | fold difference | p-value | corrected p-value |
|---------|-----------------|------------------------------------------------|-----------------|---------|-------------------|
| EEF2    | ENSG00000167658 | Elongation factor 2 (EF-2).                    | 1.7             | 4.9E-09 | 9.7E-05           |
| RPL15   | ENSG00000174748 | 60S ribosomal protein L15.                     | 1.7             | 1.8E-06 | 7.8E-04           |
| EPB41   | ENSG00000159023 | Protein 4.1 (Band 4.1) (P4.1) (EPB4.1) (4.1R). | 2.4             | 3.1E-07 | 4.7E-04           |

**C. Overlap of the THRLBCL gene expression signature with Dave *et al.* (3), unfavorable immune response in follicular lymphoma.**

| HGNC ID | Ensembl gene ID | Description                                                                                                                                                                             | fold difference | p-value | corrected p-value |
|---------|-----------------|-----------------------------------------------------------------------------------------------------------------------------------------------------------------------------------------|-----------------|---------|-------------------|
| ME1     | ENSG00000065833 | NADP-dependent malic enzyme (EC 1.1.1.40) (NADP-ME) (Malic enzyme 1).                                                                                                                   | 11.7            | 1.3E-07 | 9.7E-04           |
| DUSP3   | ENSG00000108861 | Dual specificity protein phosphatase 3 (EC 3.1.3.48) (EC 3.1.3.16) (Dual specificity protein phosphatase VHR).                                                                          | 5.1             | 1.4E-08 | 1.2E-04           |
| SCARB2  | ENSG00000138760 | Lysosome membrane protein 2 (Lysosome membrane protein II) (LIMP II) (Scavenger receptor class B member 2) (85 kDa lysosomal membrane sialoglycoprotein) (LGP85) (CD36 antigen-like 2). | 4.4             | 1.9E-11 | 2.2E-05           |
| FCGR1A  | ENSG00000150337 | High affinity immunoglobulin gamma Fc receptor I precursor (Fc-gamma RI) (FcRI) (IgG Fc receptor I) (CD64 antigen).                                                                     | 35.3            | 3.8E-08 | 9.7E-05           |
|         | ENSG00000168994 | Uncharacterized protein C6orf145.                                                                                                                                                       | 2.5             | 1.6E-08 | 4.1E-04           |
| C3AR1   | ENSG00000171860 | C3a anaphylatoxin chemotactic receptor (C3a-R) (C3AR).                                                                                                                                  | 11.0            | 1.3E-11 | 2.2E-05           |
| C1QB    | ENSG00000173369 | Complement C1q subcomponent subunit B precursor.                                                                                                                                        | 10.6            | 2.0E-09 | 2.2E-05           |
| C1QA    | ENSG00000173372 | Complement C1q subcomponent subunit A precursor.                                                                                                                                        | 8.3             | 3.6E-09 | 2.2E-05           |
| MITF    | ENSG00000187098 | Microphthalmia-associated transcription factor.                                                                                                                                         | 4.3             | 6.4E-09 | 1.6E-04           |



**D. Overlap of the THRLBCL gene expression signature with the Monti *et al.* (1) host inflammatory response in diffuse large B cell lymphoma signature.**

| HGNC ID  | Ensembl gene ID | description                                                                                                                                                                                                                                                    | fold difference | p-value | corrected p-value |
|----------|-----------------|----------------------------------------------------------------------------------------------------------------------------------------------------------------------------------------------------------------------------------------------------------------|-----------------|---------|-------------------|
| GRN      | ENSG00000030582 | Granulins precursor (Proepithelin) (PEPI) [Contains: Acrogranin; Paragranulin; Granulin-1 (Granulin G); Granulin-2 (Granulin F); Granulin-3 (Granulin B); Granulin-4 (Granulin A); Granulin-5 (Granulin C); Granulin-6 (Granulin D); Granulin-7 (Granulin E)]. | 3.1             | 5.4E-08 | 5.2E-04           |
| STAT1    | ENSG00000115415 | Signal transducer and activator of transcription 1-alpha/beta (Transcription factor ISGF-3 components p91/p84).                                                                                                                                                | 1.6             | 1.6E-10 | 3.2E-05           |
| GBP1     | ENSG00000117228 | Interferon-induced guanylate-binding protein 1 (GTP-binding protein 1) (Guanine nucleotide-binding protein 1) (HuGBP-1).                                                                                                                                       | 3.0             | 2.6E-08 | 6.1E-04           |
| CTSD     | ENSG00000117984 | Cathepsin D precursor (EC 3.4.23.5) [Contains: Cathepsin D light chain; Cathepsin D heavy chain].                                                                                                                                                              | 3.4             | 6.4E-08 | 1.0E-03           |
| TNFSF10  | ENSG00000121858 | Tumor necrosis factor ligand superfamily member 10 (TNF-related apoptosis-inducing ligand) (TRAIL protein) (Apo-2 ligand) (Apo-2L) (CD253 antigen).                                                                                                            | 3.6             | 2.5E-08 | 3.0E-04           |
|          | ENSG00000134470 | Interleukin-15 receptor alpha chain precursor (IL-15R-alpha) (IL-15RA).                                                                                                                                                                                        | 4.5             | 3.1E-09 | 6.5E-05           |
| SERPING1 | ENSG00000149131 | Plasma protease C1 inhibitor precursor (C1 Inh) (C1Inh).                                                                                                                                                                                                       | 5.7             | 2.2E-09 | 6.5E-05           |
| SLAMF8   | ENSG00000158714 | SLAM family member 8 precursor (B-lymphocyte activator macrophage expressed) (BCM-like membrane protein).                                                                                                                                                      | 6.2             | 4.8E-07 | 6.5E-04           |
| CTSB     | ENSG00000164733 | Cathepsin B precursor (EC 3.4.22.1) (Cathepsin B1) (APP secretase) (APPS) [Contains: Cathepsin B light chain; Cathepsin B heavy chain].                                                                                                                        | 6.1             | 8.6E-10 | 2.2E-05           |

A tumor tolerogenic microenvironment in THRLBCL

| HGNC ID | Ensembl gene ID | description                                                                                                                                                                                                                    | fold difference | p-value | corrected p-value |
|---------|-----------------|--------------------------------------------------------------------------------------------------------------------------------------------------------------------------------------------------------------------------------|-----------------|---------|-------------------|
| CD14    | ENSG00000170458 | Monocyte differentiation antigen CD14 precursor (Myeloid cell-specific leucine-rich glycoprotein) [Contains: Monocyte differentiation antigen CD14, urinary form; Monocyte differentiation antigen CD14, membrane-bound form]. | 9.2             | 4.0E-10 | 2.2E-05           |
| C1QB    | ENSG00000173369 | Complement C1q subcomponent subunit B precursor.                                                                                                                                                                               | 10.6            | 2.0E-09 | 2.2E-05           |
| CD163   | ENSG00000177575 | Scavenger receptor cysteine-rich type 1 protein M130 precursor (CD163 antigen) (Hemoglobin scavenger receptor) [Contains: Soluble CD163 (sCD163)].                                                                             | 50.5            | 3.1E-09 | 2.2E-05           |
| CSF1R   | ENSG00000182578 | Macrophage colony-stimulating factor 1 receptor precursor (CSF-1-R) (EC 2.7.10.1) (Fms proto-oncogene) (c-fms) (CD115 antigen).                                                                                                | 4.2             | 3.0E-08 | 6.4E-04           |
| SIRPA   | ENSG00000198053 | Tyrosine-protein phosphatase non-receptor type substrate 1 precursor (SHP substrate 1) (SHPS-1) (Inhibitory receptor SHPS-1) (Signal-regulatory protein alpha-1) (Sirp-alpha-1) (Sirp-alpha-2) (Sirp-alpha-3) (MyD-1 antigen)  | 5.0             | 1.8E-08 | 3.6E-04           |

**E. Overlap of the THRLBCL gene expression signature with the Brune et al. (2), genes up-regulated in microdissected NPLHL tumor cells compared with normal B cells and B-non Hodgkin lymphoma.**

| HGNC ID  | Ensembl gene ID | description                                                                                                                                                                             | fold difference | p-value | corrected p-value |
|----------|-----------------|-----------------------------------------------------------------------------------------------------------------------------------------------------------------------------------------|-----------------|---------|-------------------|
| NPL      | ENSG00000135838 | N-acetylneuraminate pyruvate lyase                                                                                                                                                      | 4.2             | 4.0E-10 | 3.2E-05           |
| SLC1A3   | ENSG00000079215 | Excitatory amino acid transporter 1 (Sodium-dependent glutamate/aspartate transporter 1) (Glial glutamate transporter) (GLAST-1).                                                       | 6.7             | 7.8E-09 | 1.4E-04           |
| CTSB     | ENSG00000164733 | Cathepsin B precursor (EC 3.4.22.1) (Cathepsin B1) (APP secretase) (APPS) [Contains: Cathepsin B light chain; Cathepsin B heavy chain].                                                 | 6.1             | 8.6E-10 | 2.2E-05           |
| SCARB2   | ENSG00000138760 | Lysosome membrane protein 2 (Lysosome membrane protein II) (LIMP II) (Scavenger receptor class B member 2) (85 kDa lysosomal membrane sialoglycoprotein) (LGP85) (CD36 antigen-like 2). | 4.4             | 1.9E-11 | 2.2E-05           |
| SERPING1 | ENSG00000149131 | Plasma protease C1 inhibitor precursor (C1 Inh) (C1Inh).                                                                                                                                | 5.7             | 2.2E-09 | 6.5E-05           |
| SLC31A1  | ENSG00000136868 | High-affinity copper uptake protein 1 (hCTR1) (Copper transporter 1) (Solute carrier family 31 member 1).                                                                               | 8.6             | 1.1E-09 | 8.7E-05           |
| SCPEP1   | ENSG00000121064 | Retinoid-inducible serine carboxypeptidase precursor (EC 3.4.16.-) (Serine carboxypeptidase 1).                                                                                         | 5.1             | 2.7E-09 | 9.7E-05           |
| FPR1     | ENSG00000171051 | fMet-Leu-Phe receptor (fMLP receptor) (N-formyl peptide receptor) (FPR) (N-formylpeptide chemoattractant receptor).                                                                     | 6.7             | 1.4E-09 | 6.5E-05           |
| PNKD     | ENSG00000127838 | myofibrillogenesis regulator 1 isoform 2                                                                                                                                                | 6.3             | 4.6E-11 | 2.2E-05           |

A tumor tolerogenic microenvironment in THRLBCL

**F. Overlap of the THRLBCL gene expression signature with Brune et al. (2), genes up-regulated in microdissected NLPHL tumor cells compared with classical Hodgkin lymphoma (and germinal centre B cells).**

| HGNC ID | Ensembl gene ID | Description                                                                                                                                                                                                                  | fold difference | p-value | corrected p-value |
|---------|-----------------|------------------------------------------------------------------------------------------------------------------------------------------------------------------------------------------------------------------------------|-----------------|---------|-------------------|
| GBP1    | ENSG00000117228 | Interferon-induced guanylate-binding protein 1 (GTP-binding protein 1) (Guanine nucleotide-binding protein 1) (HuGBP-1).                                                                                                     | 3.0             | 2.6E-08 | 6.1E-04           |
| STAT1   | ENSG00000115415 | Signal transducer and activator of transcription 1-alpha/beta (Transcription factor ISGF-3 components p91/p84).                                                                                                              | 1.6             | 1.6E-10 | 3.2E-05           |
| SLC31A1 | ENSG00000136868 | High-affinity copper uptake protein 1 (hCTR1) (Copper transporter 1) (Solute carrier family 31 member 1).                                                                                                                    | 8.6             | 1.1E-09 | 8.7E-05           |
| BID     | ENSG00000015475 | BH3-interacting domain death agonist (BID) (p22 BID) [Contains: BH3-interacting domain death agonist p15 (p15 BID); BH3-interacting domain death agonist p13 (p13 BID); BH3-interacting domain death agonist p11 (p11 BID)]. | 2.5             | 6.0E-09 | 1.5E-04           |

**Supplementary Table 5. Expression values of T cell genes.**

Fold difference refers to average expression in THRLBCL compared to average expression in NLPHL. P-values are given before and after correction for multiple testing.

| Affymetrix probe ID | HGNC | Ensembl ID      | description                                                                                                           | fold difference | p-value | corrected p-value |
|---------------------|------|-----------------|-----------------------------------------------------------------------------------------------------------------------|-----------------|---------|-------------------|
| 213539_at           | CD3D | ENSG00000167286 | T-cell surface glycoprotein CD3 delta chain precursor (T-cell receptor T3 delta chain).                               | 0.76            | 0.016   | 1.00              |
| 205456_at           | CD3E | ENSG00000198851 | T-cell surface glycoprotein CD3 epsilon chain precursor (T-cell surface antigen T3/Leu-4 epsilon chain).              | 0.64            | 2.9E-04 | 0.65              |
| 206804_at           | CD3G | ENSG00000160654 | T-cell surface glycoprotein CD3 gamma chain precursor (T-cell receptor T3 gamma chain).                               | 0.65            | 8.8E-04 | 0.92              |
| 203547_at           | CD4  | ENSG00000010610 | T-cell surface glycoprotein CD4 precursor (T-cell surface antigen T4/Leu-3).                                          | 1.16            | 0.064   | 1.00              |
| 205758_at           | CD8A | ENSG00000153563 | T-cell surface glycoprotein CD8 alpha chain precursor (T-lymphocyte differentiation antigen T8/Leu-2) (CD8a antigen). | 2.19            | 1.9E-03 | 0.99              |
| 215332_s_at         | CD8B | ENSG00000172116 | T-cell surface glycoprotein CD8 beta chain precursor (CD8b antigen).                                                  | 1.21            | 0.44    | 1.00              |
| 206545_at           | CD28 | ENSG00000178562 | T-cell-specific surface glycoprotein CD28 precursor (TP44).                                                           | 0.54            | 1.1E-03 | 0.95              |
| 211856_x_at         | CD28 | ENSG00000178562 | T-cell-specific surface glycoprotein CD28 precursor (TP44).                                                           | 0.63            | 0.084   | 1.00              |
| 211861_x_at         | CD28 | ENSG00000178562 | T-cell-specific surface glycoprotein CD28 precursor (TP44).                                                           | 0.59            | 0.059   | 1.00              |
| 208850_s_at         | THY1 | ENSG00000154096 | Thy-1 membrane glycoprotein precursor (Thy-1 antigen) (CD90 antigen) (CDw90).                                         | 0.51            | 0.015   | 1.00              |
| 208851_s_at         | THY1 | ENSG00000154096 | Thy-1 membrane glycoprotein precursor (Thy-1 antigen) (CD90 antigen) (CDw90).                                         | 0.60            | 0.029   | 1.00              |

A tumor tolerogenic microenvironment in THRLBCL

| Affymetrix probe ID | HGNC   | Ensembl ID      | description                                                                                                                                                                                                               | fold difference | p-value | corrected p-value |
|---------------------|--------|-----------------|---------------------------------------------------------------------------------------------------------------------------------------------------------------------------------------------------------------------------|-----------------|---------|-------------------|
| 213869_x_at         | THY1   | ENSG00000154096 | Thy-1 membrane glycoprotein precursor (Thy-1 antigen) (CD90 antigen) (CDw90).                                                                                                                                             | 0.52            | 0.016   | 1.00              |
| 231794_at           | CTLA4  | ENSG00000163599 | Cytotoxic T-lymphocyte protein 4 precursor (Cytotoxic T-lymphocyte- associated antigen 4) (CTLA-4) (CD152 antigen).                                                                                                       | 0.72            | 0.18    | 1.00              |
| 234362_s_at         | CTLA4  | ENSG00000163599 | Cytotoxic T-lymphocyte protein 4 precursor (Cytotoxic T-lymphocyte- associated antigen 4) (CTLA-4) (CD152 antigen).                                                                                                       | 0.71            | 0.23    | 1.00              |
| 234895_at           | CTLA4  | ENSG00000163599 | Cytotoxic T-lymphocyte protein 4 precursor (Cytotoxic T-lymphocyte- associated antigen 4) (CTLA-4) (CD152 antigen).                                                                                                       | 1.01            | 0.033   | 1.00              |
| 236341_at           | CTLA4  | ENSG00000163599 | Cytotoxic T-lymphocyte protein 4 precursor (Cytotoxic T-lymphocyte- associated antigen 4) (CTLA-4) (CD152 antigen).                                                                                                       | 0.67            | 0.19    | 1.00              |
| 207892_at           | CD40LG | ENSG00000102245 | CD40 ligand (CD40-L) (Tumor necrosis factor ligand superfamily member 5) (TNF-related activation protein) (TRAP) (T cell antigen Gp39) (CD154 antigen) [Contains: CD40 ligand, membrane form; CD40 ligand, soluble form]. | 0.75            | 0.029   | 1.00              |
| 210439_at           | ICOS   | ENSG00000163600 | Inducible T-cell co-stimulator precursor (Activation-inducible lymphocyte immunomediatory molecule) (CD278 antigen).                                                                                                      | 0.34            | 7.8E-04 | 0.90              |
| 207849_at           | IL2    | ENSG00000109471 | Interleukin-2 precursor (IL-2) (T-cell growth factor) (TCGF) (Aldesleukin).                                                                                                                                               | 1.01            | 0.48    | 1.00              |
| 207538_at           | IL4    | ENSG00000113520 | Interleukin-4 precursor (IL-4) (B-cell stimulatory factor 1) (BSF-1) (Lymphocyte stimulatory factor 1) (Binetrakin) (Pitrakinra).                                                                                         | 1.01            | 0.073   | 1.00              |
| 207952_at           | IL5    | ENSG00000113525 | Interleukin-5 precursor (IL-5) (T-cell replacing factor) (TRF) (Eosinophil differentiation factor) (B cell differentiation factor I).                                                                                     | 1.02            | 0.046   | 1.00              |
| 207844_at           | IL13   | ENSG00000169194 | Interleukin-13 precursor (IL-13).                                                                                                                                                                                         | 1.01            | 0.81    | 1.00              |
| 208402_at           | IL17A  | ENSG00000112115 | Interleukin-17A precursor (IL-17A) (IL-17) (Cytotoxic T-lymphocyte-associated antigen 8) (CTLA-8).                                                                                                                        | 1.02            | 0.046   | 1.00              |

A tumor tolerogenic microenvironment in THRLBCL

| Affymetrix probe ID | HGNC  | Ensembl ID      | description                                                                                                                       | fold difference | p-value | corrected p-value |
|---------------------|-------|-----------------|-----------------------------------------------------------------------------------------------------------------------------------|-----------------|---------|-------------------|
| 216876_s_at         | IL17A | ENSG00000112115 | Interleukin-17A precursor (IL-17A) (IL-17) (Cytotoxic T-lymphocyte-associated antigen 8) (CTLA-8).                                | 1.16            | 0.64    | 1.00              |
| 206341_at           | IL2RA | ENSG00000134460 | Interleukin-2 receptor alpha chain precursor (IL-2 receptor alpha subunit) (IL-2-RA) (IL2-RA) (p55) (TAC antigen) (CD25 antigen). | 2.32            | 1.9E-03 | 0.99              |

©Ferrata Storti Foundation
